# Supplementary material for: Radical-mediated reduction of the dithiocarbamate group under tin-free conditions
Source: Royal Society of Chemistry journal article supplement (doi:10.1039/c2ob25434d), 2012-01-01

# Radical-mediated reduction of the dithiocarbamate group under tin-free conditions

Claire McMaster,<sup>a</sup> Robert N. Bream,<sup>b</sup> Richard S. Grainger<sup>a\*</sup>

<sup>a</sup> School of Chemistry, University of Birmingham, Edgbaston, Birmingham B15 2TT, UK. Fax: +44 (0)121 4144403; Tel: +44 (0)121 4144465;  
E-mail: r.s.grainger@bham.ac.uk

<sup>b</sup> GlaxoSmithKline, Gunnels Wood Road, Stevenage, Herts SG1 2NY, UK.

## Supplementary Information

S2-S23 Copies of - <sup>1</sup>H NMR of **2**, **4**, **10**, **7**, **13**, **14**, **15**, **10-d**, **21** and **22**

- <sup>13</sup>C NMR of **4**, **10**, **7**, **13**, **14**, **15** and **10-d**

- 1D-GOESY nOe NMR for **14**

$^1\text{H}$  NMR  $\text{CDCl}_3$  300 MHz

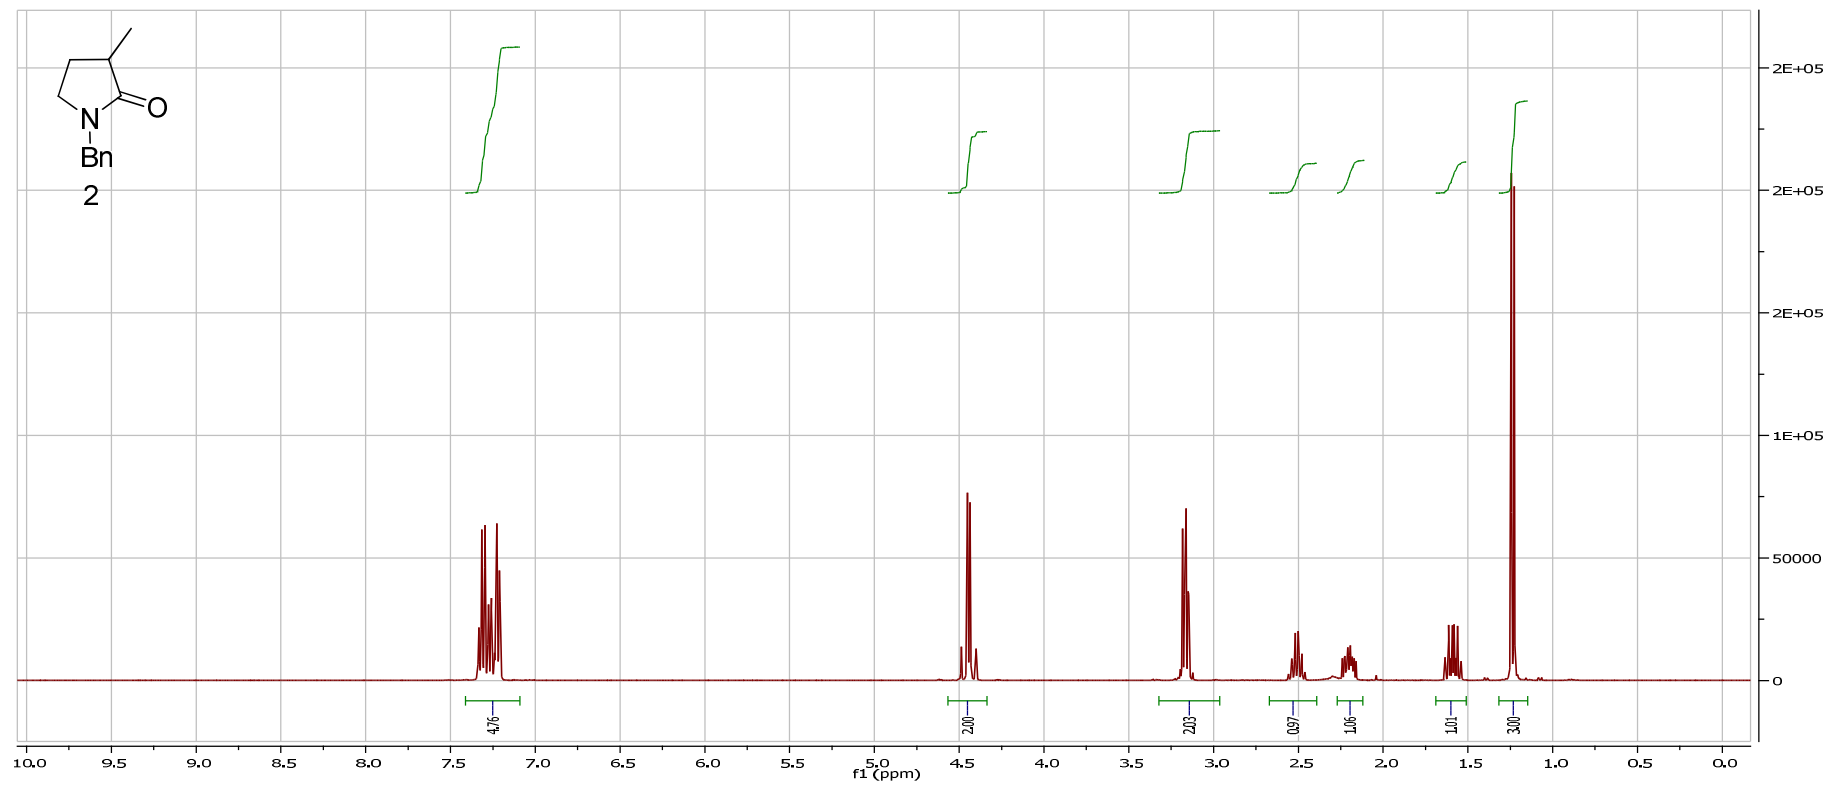

$^1\text{H}$  NMR  $\text{CDCl}_3$  300 MHz

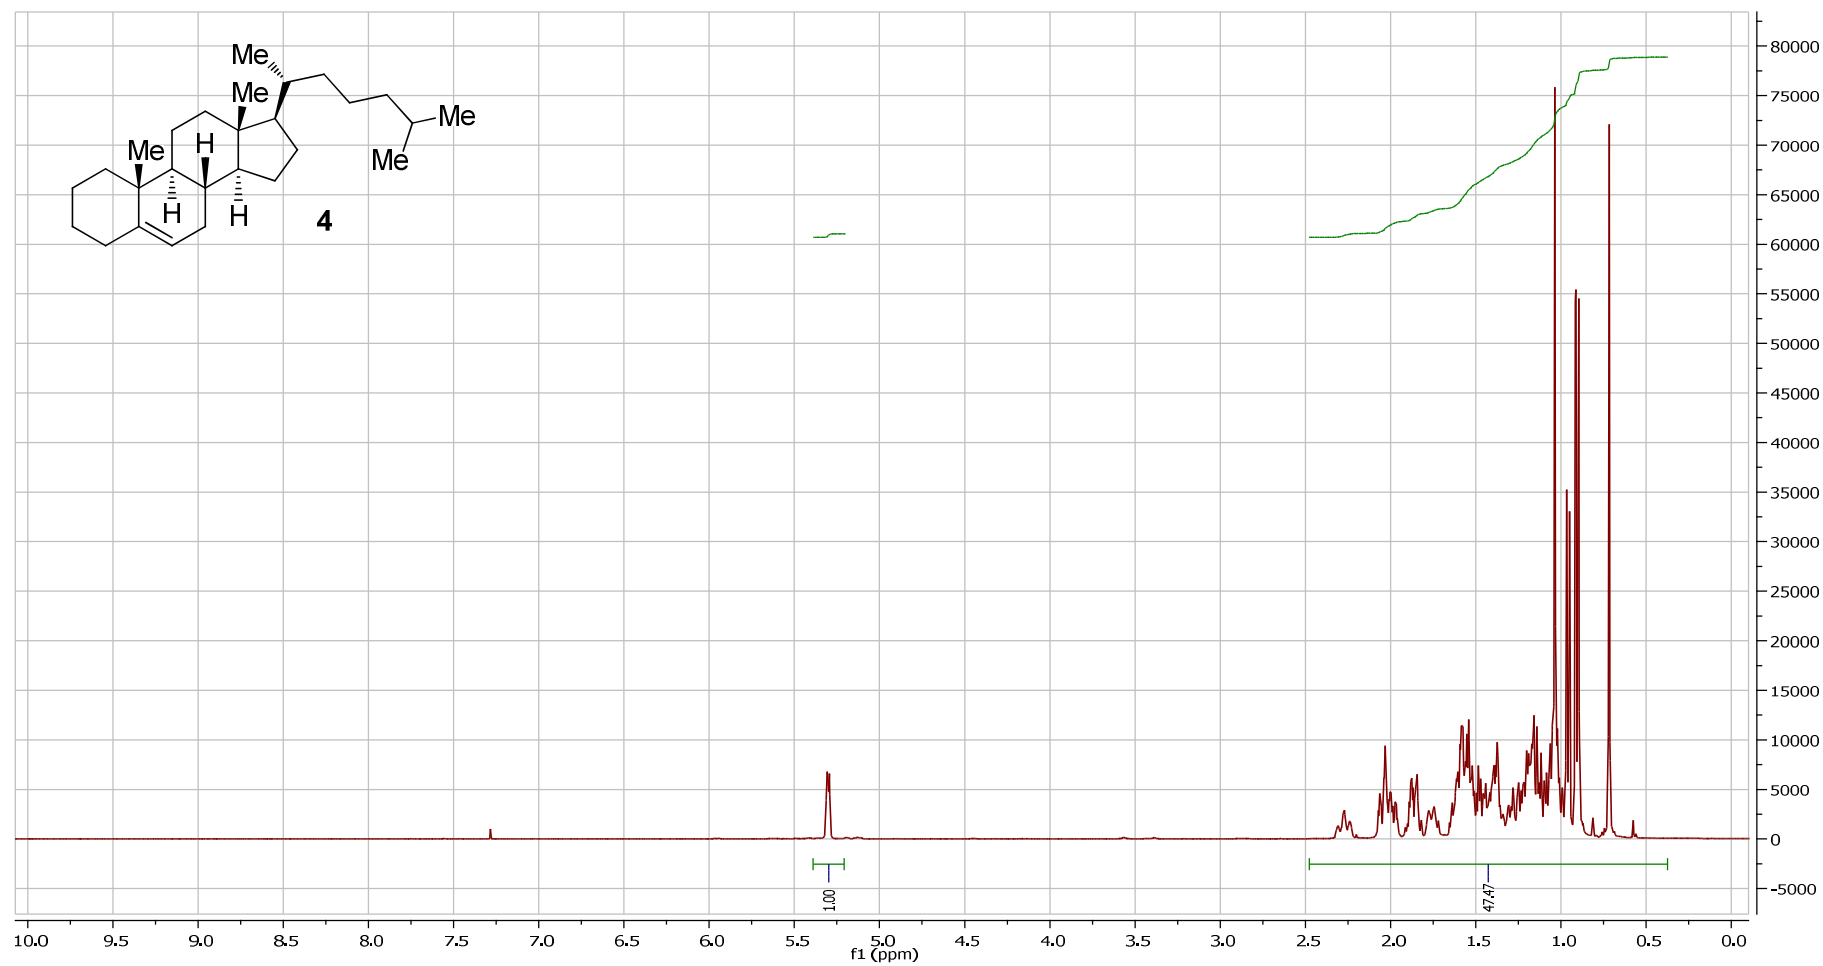

$^{13}\text{C}$  NMR  $\text{CDCl}_3$  100 MHz

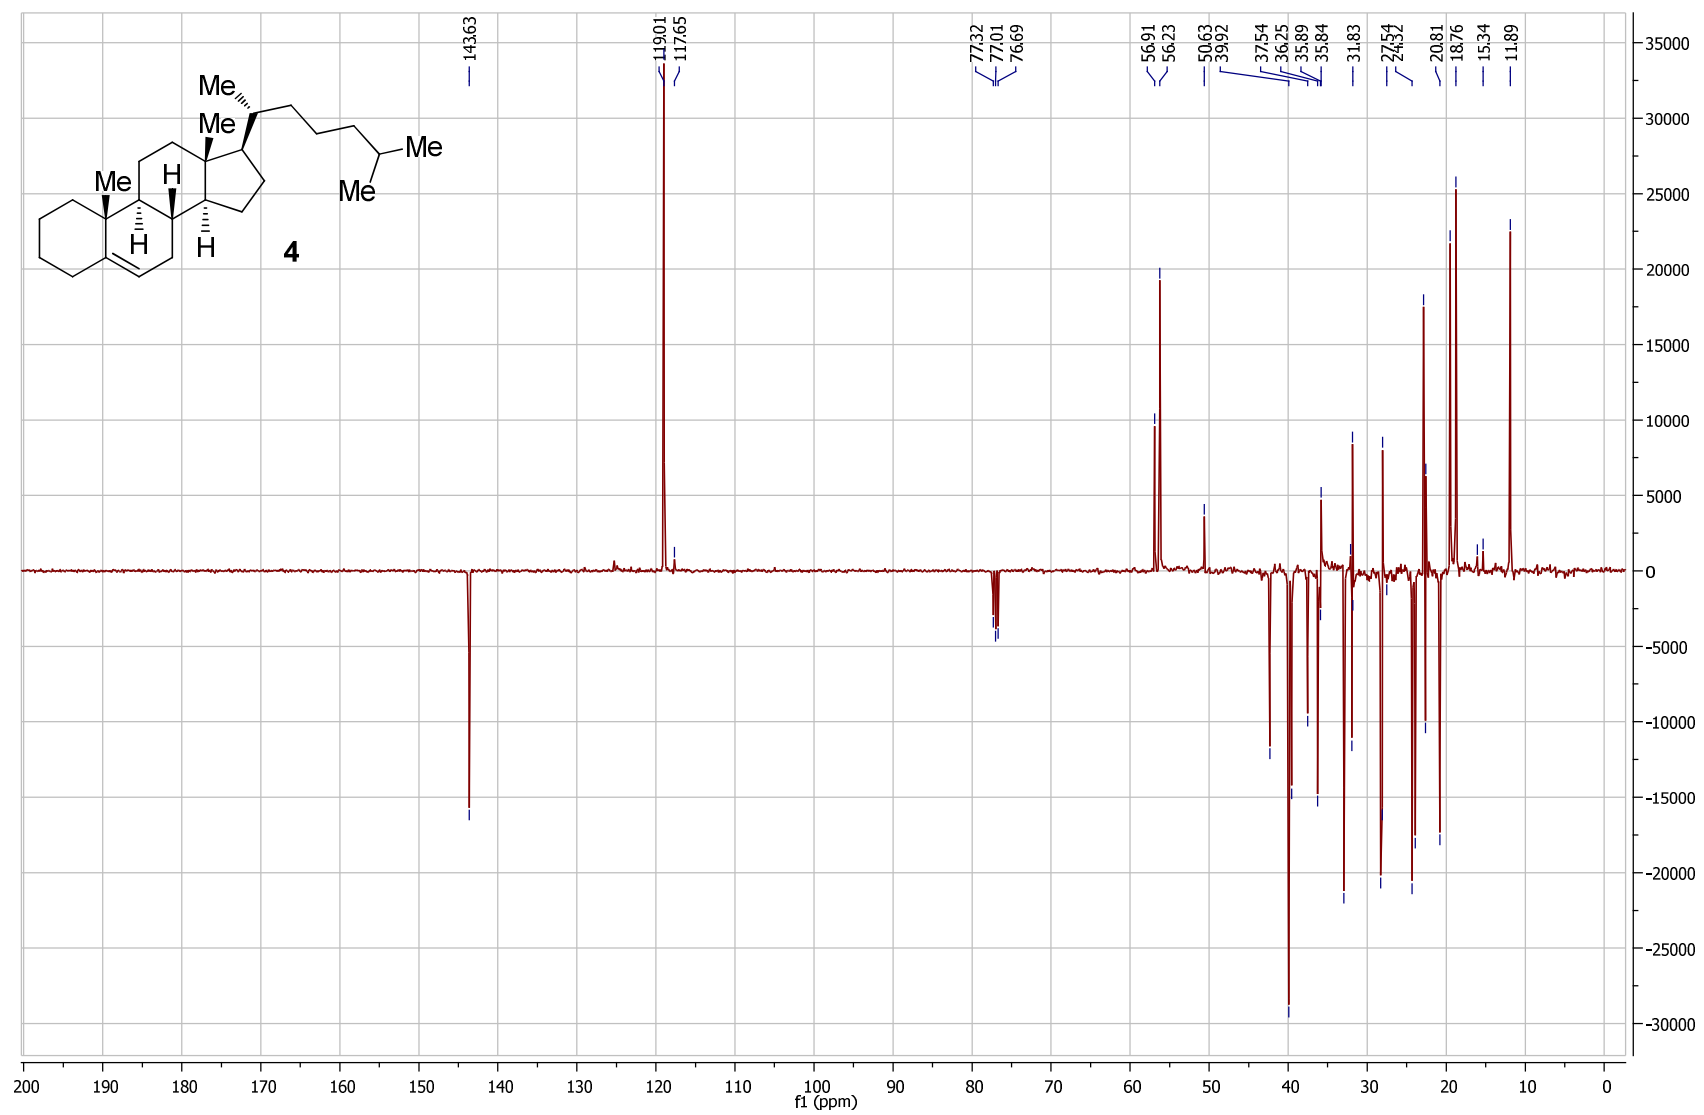

$^1\text{H}$  NMR  $\text{CDCl}_3$  300 MHz

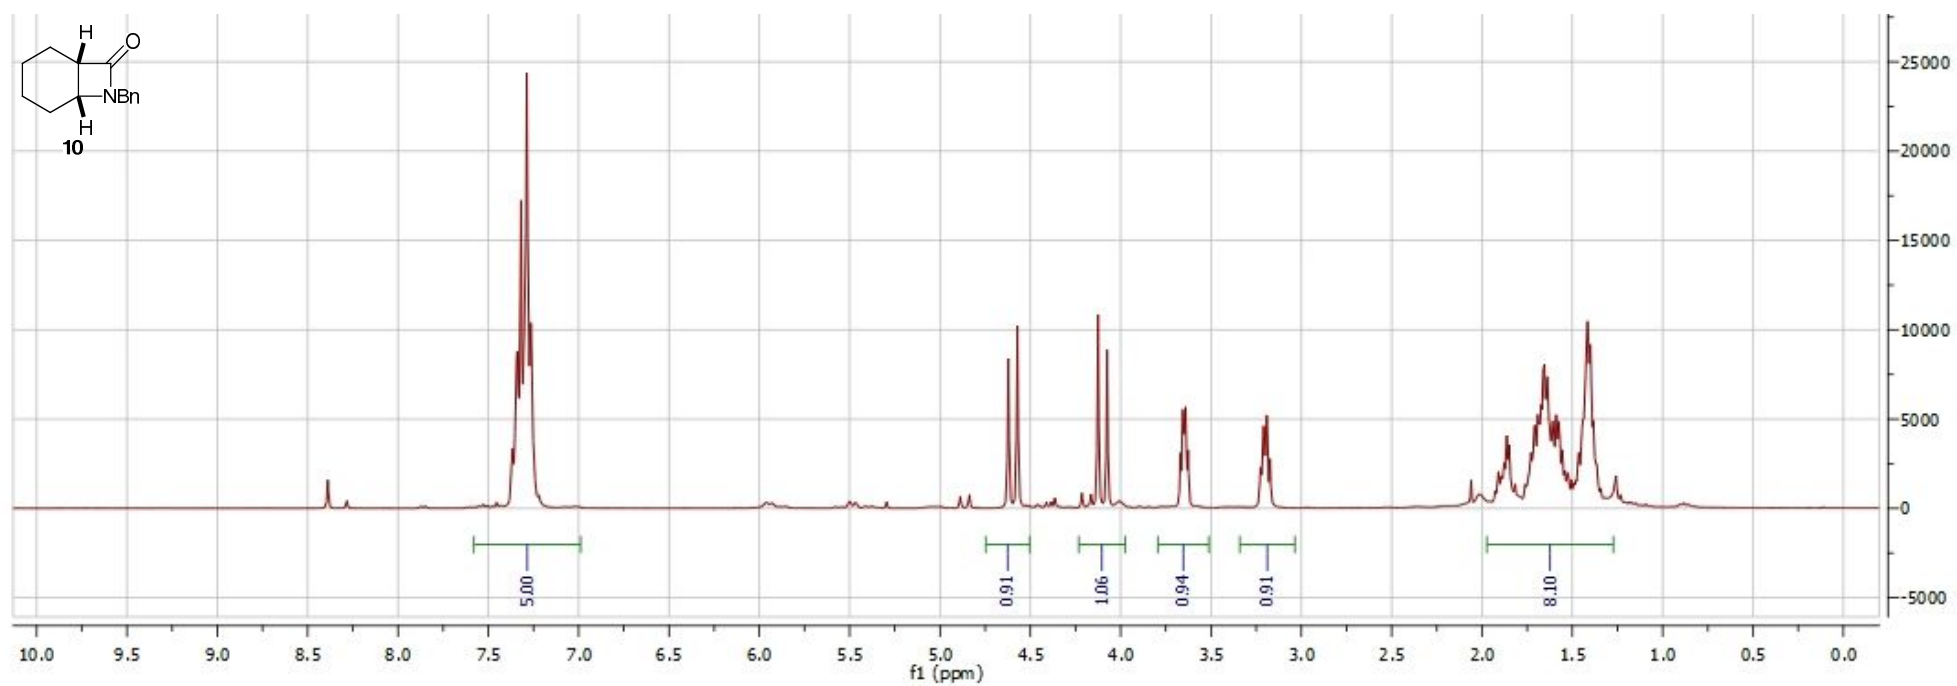

$^{13}\text{C}$  NMR  $\text{CDCl}_3$  100 MHz

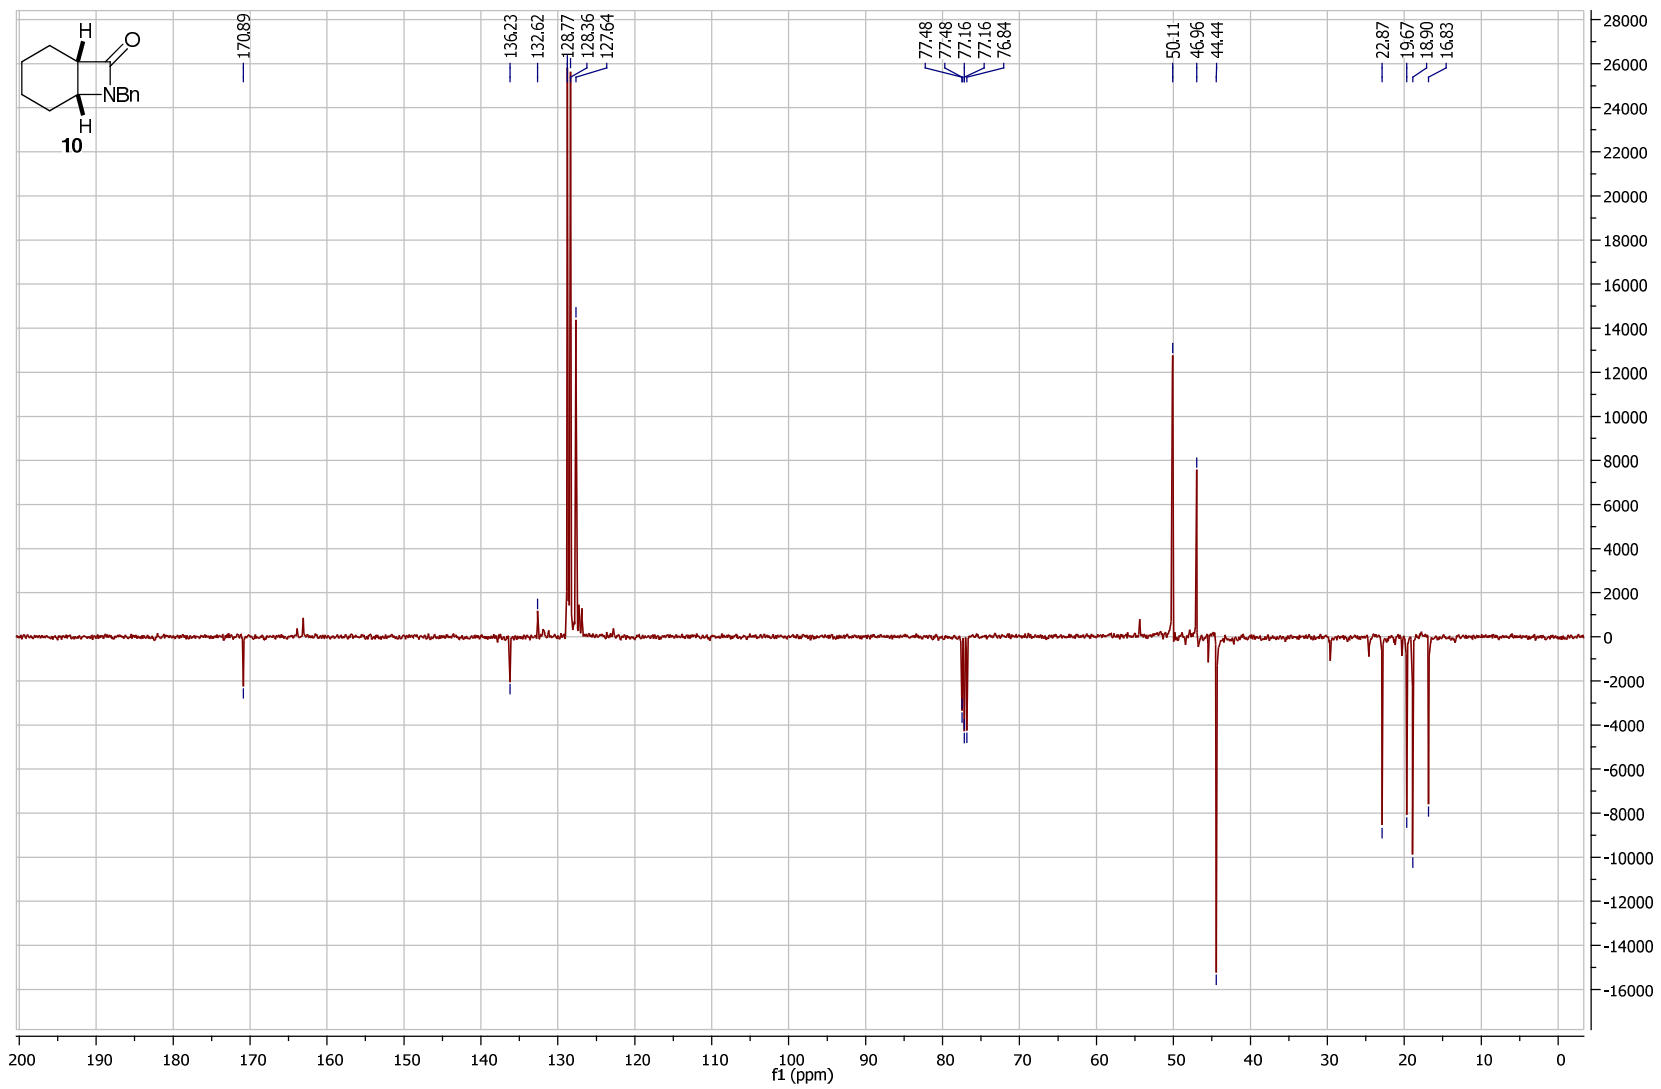

$^1\text{H}$  NMR  $\text{CDCl}_3$  300 MHz

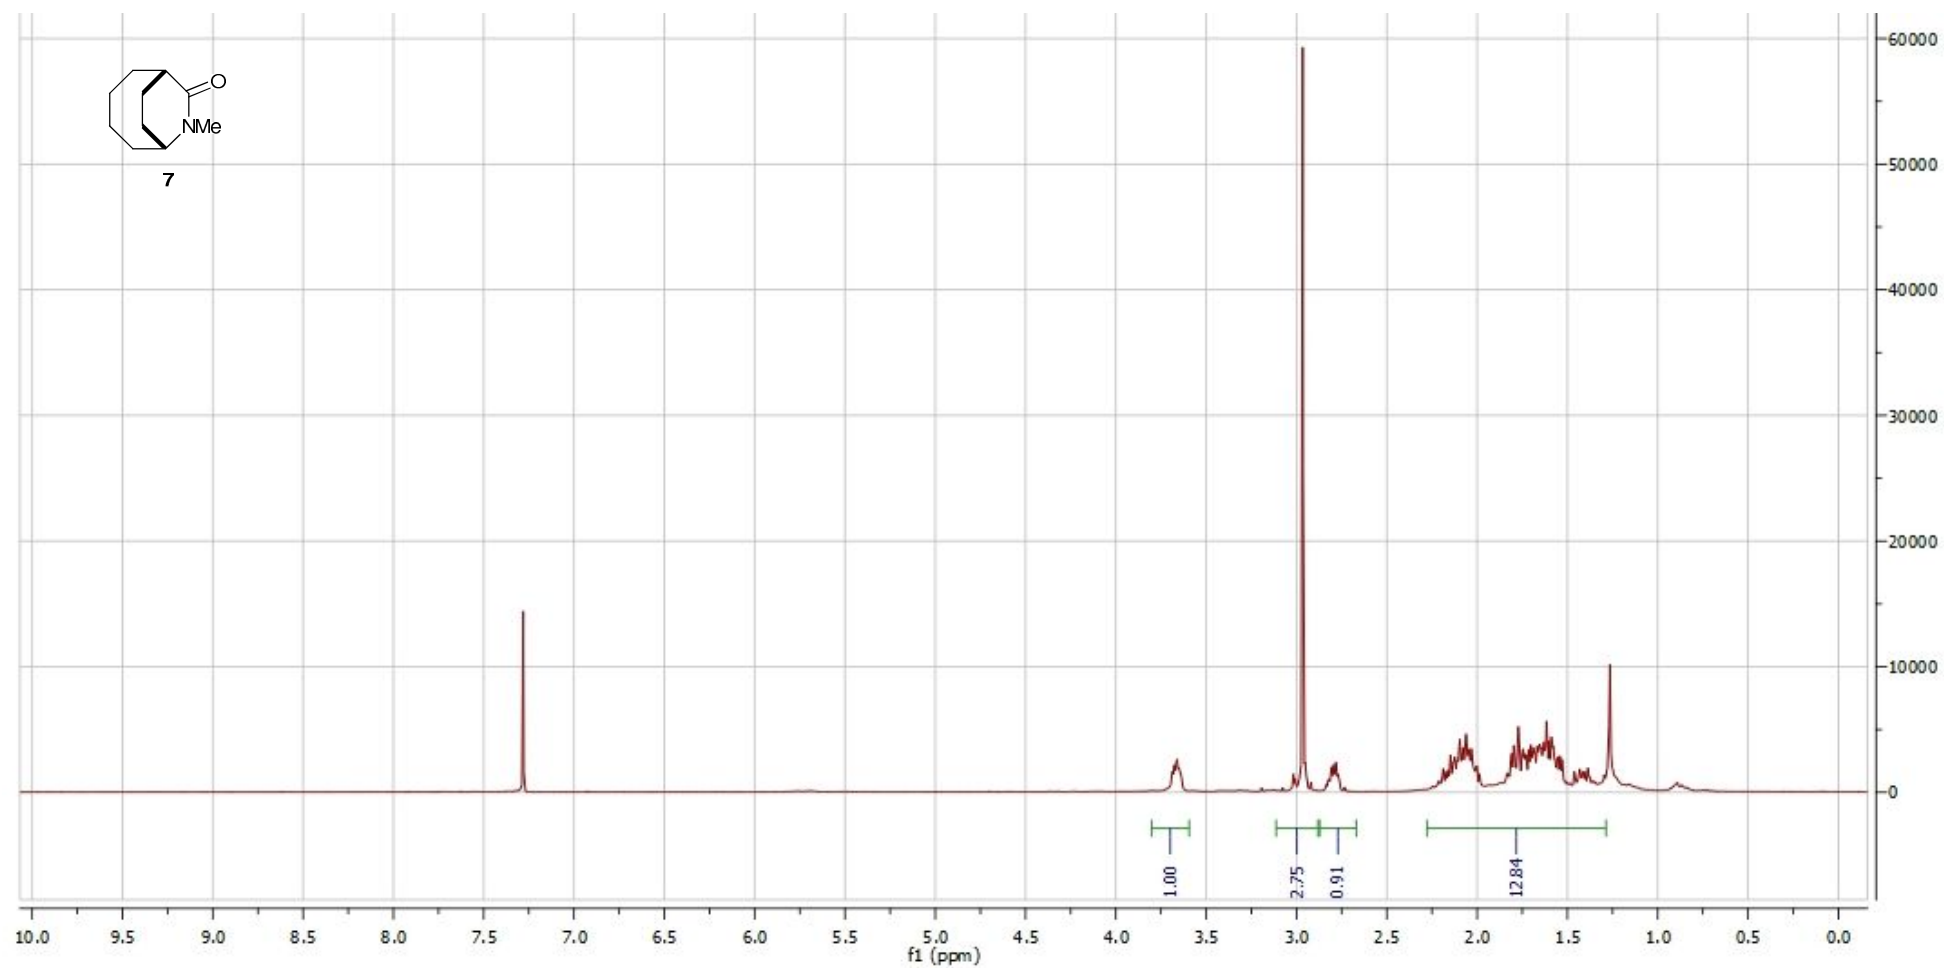

$^{13}\text{C}$  NMR  $\text{CDCl}_3$  100 MHz

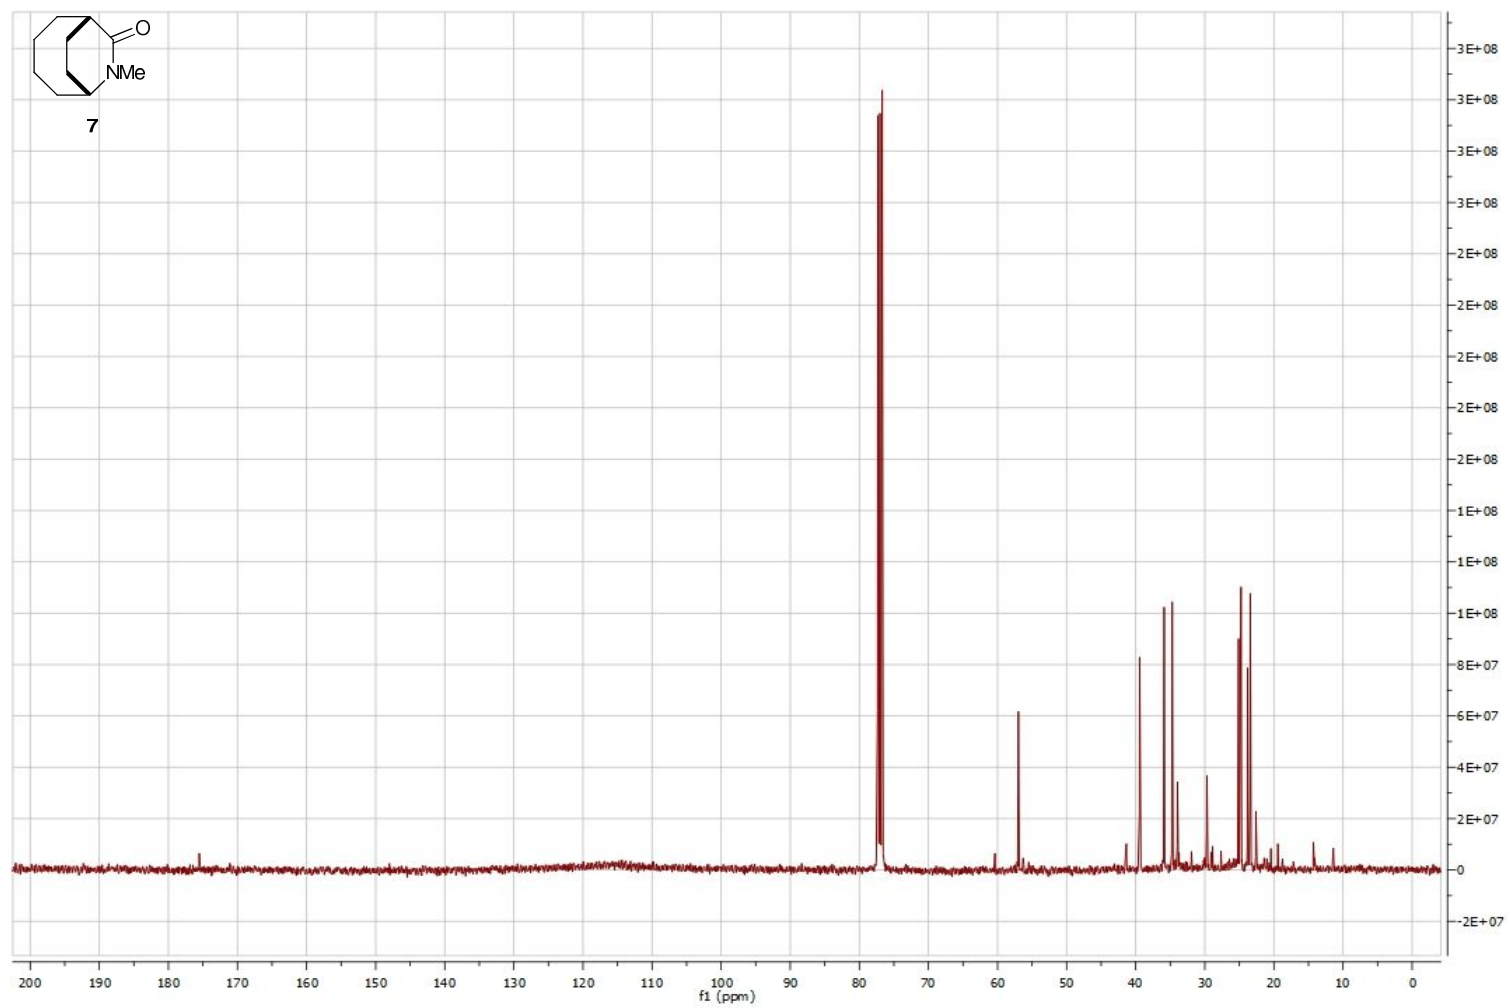



$^{13}\text{C}$  NMR  $\text{CDCl}_3$  100 MHz

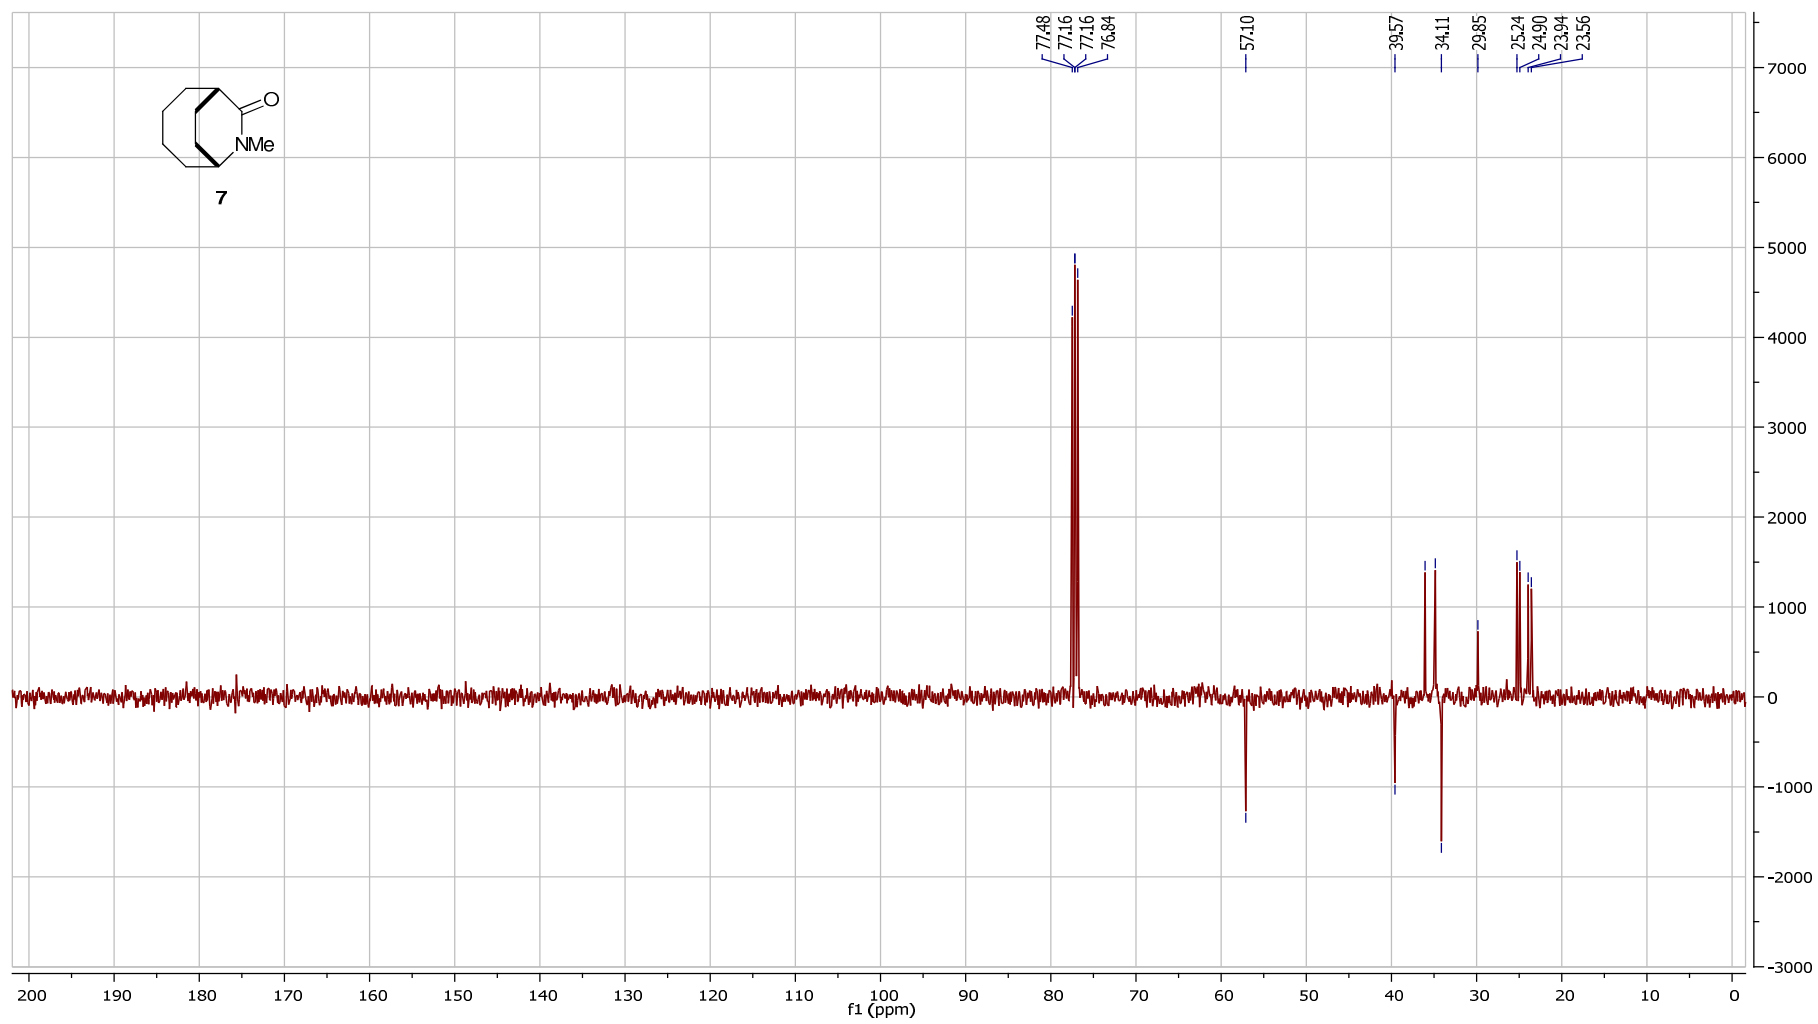

$^1\text{H}$  NMR  $\text{CDCl}_3$  300 MHz

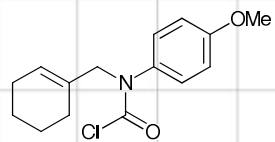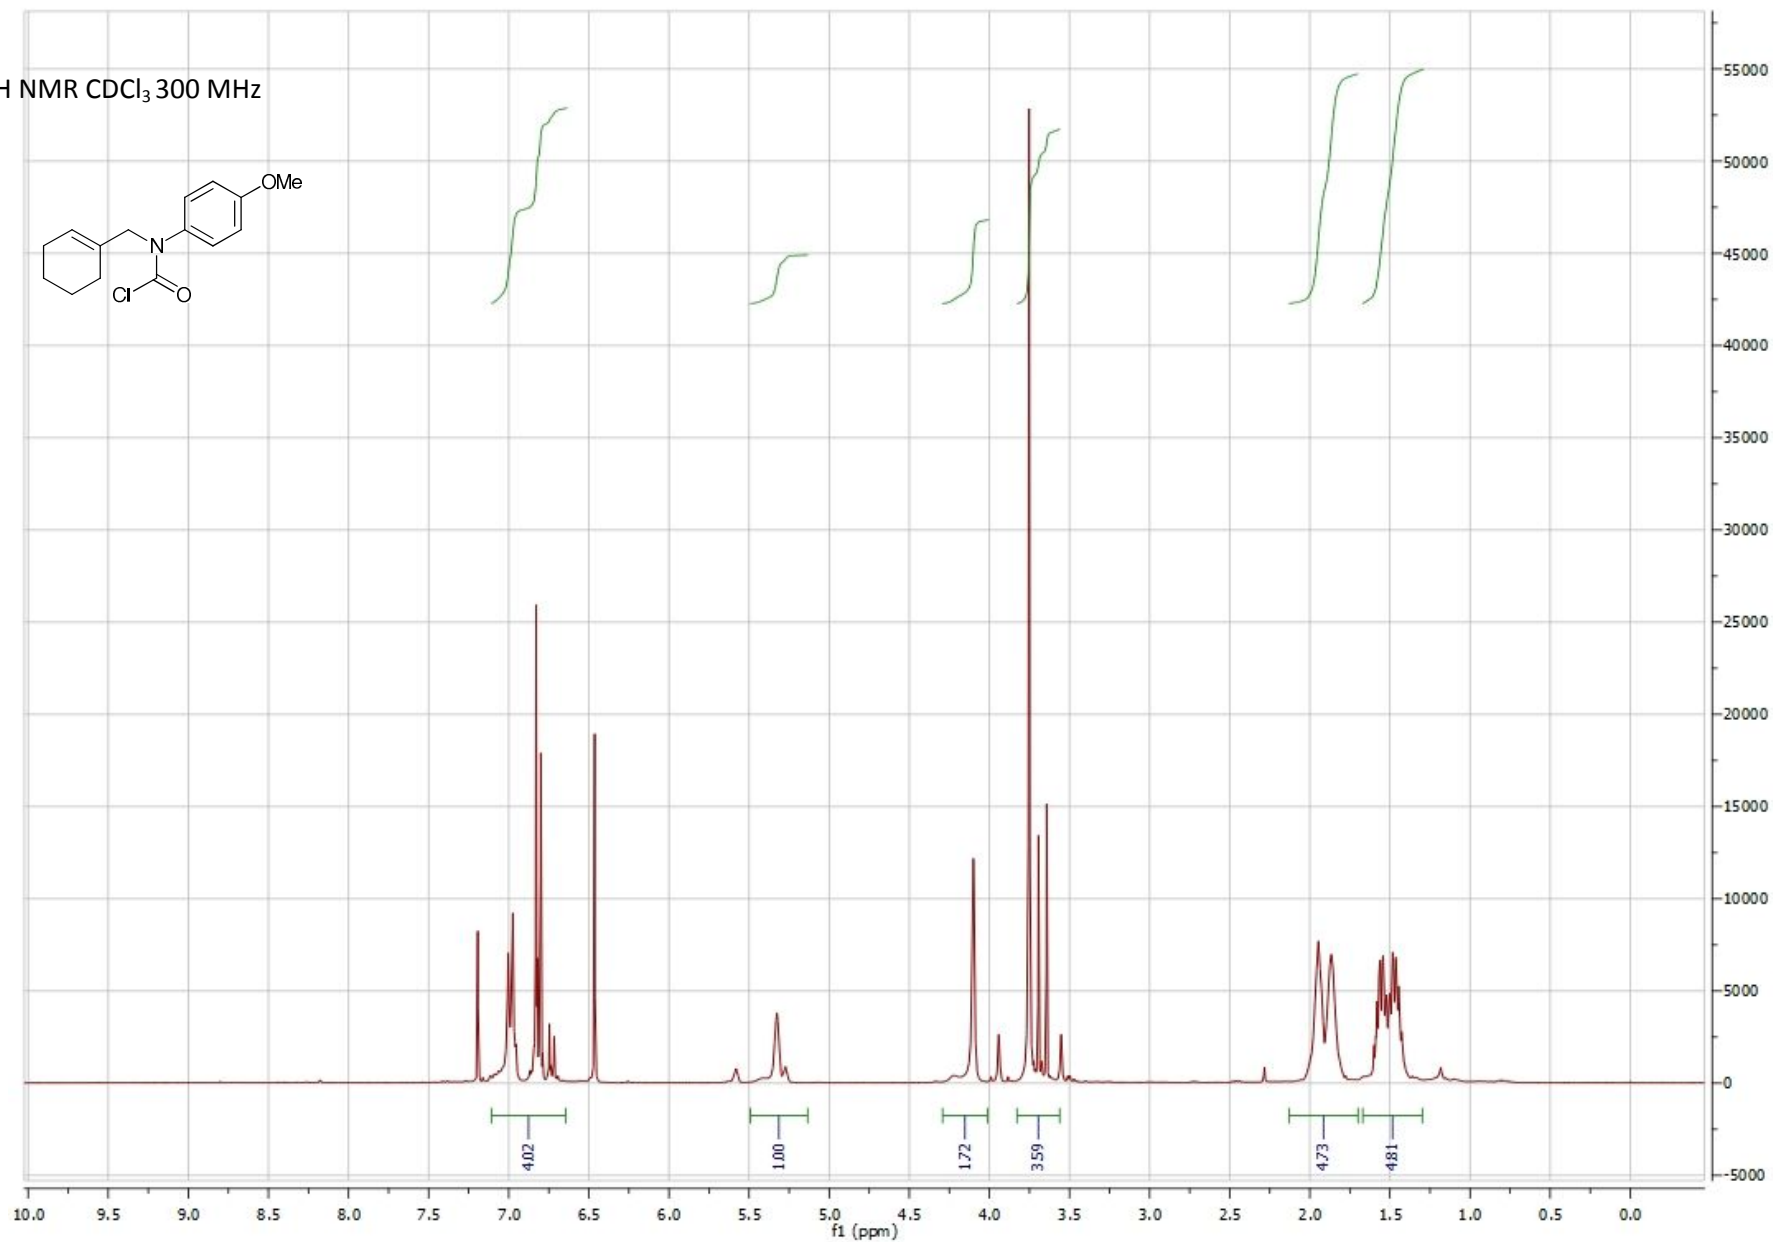

$^1\text{H}$  NMR  $\text{CDCl}_3$  300 MHz

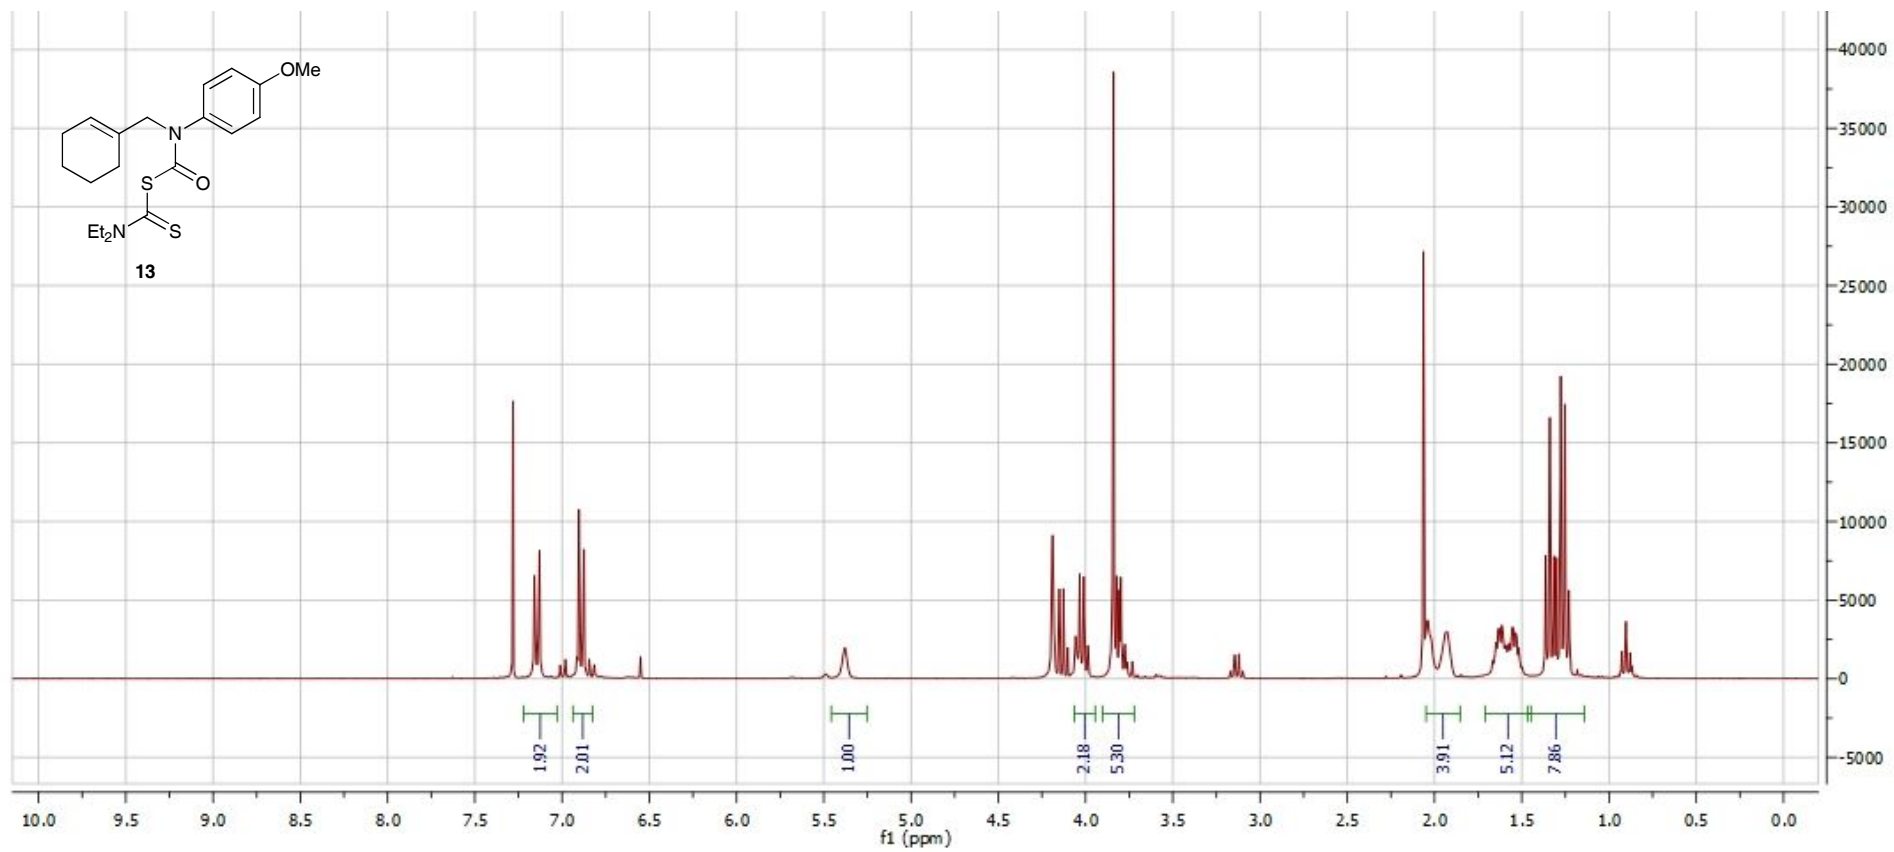

$^{13}\text{C}$  NMR  $\text{CDCl}_3$  100 MHz

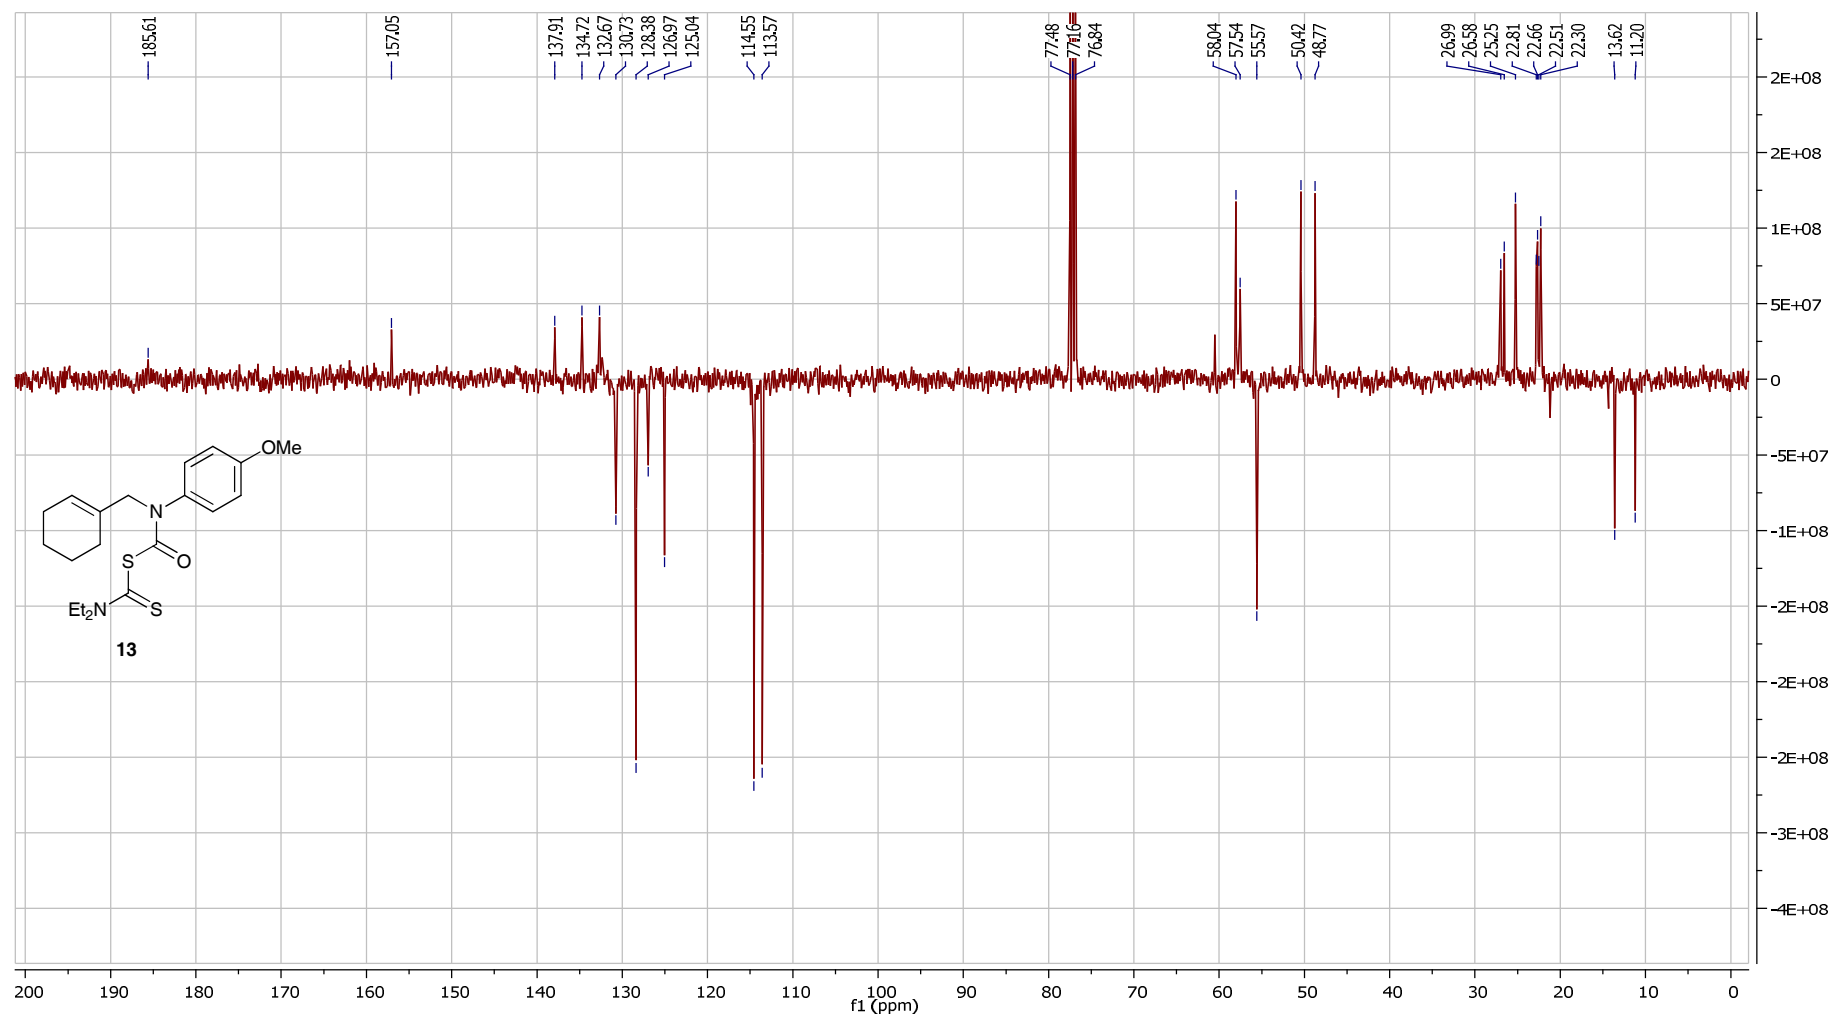

$^1\text{H}$  NMR  $\text{CDCl}_3$  300 MHz

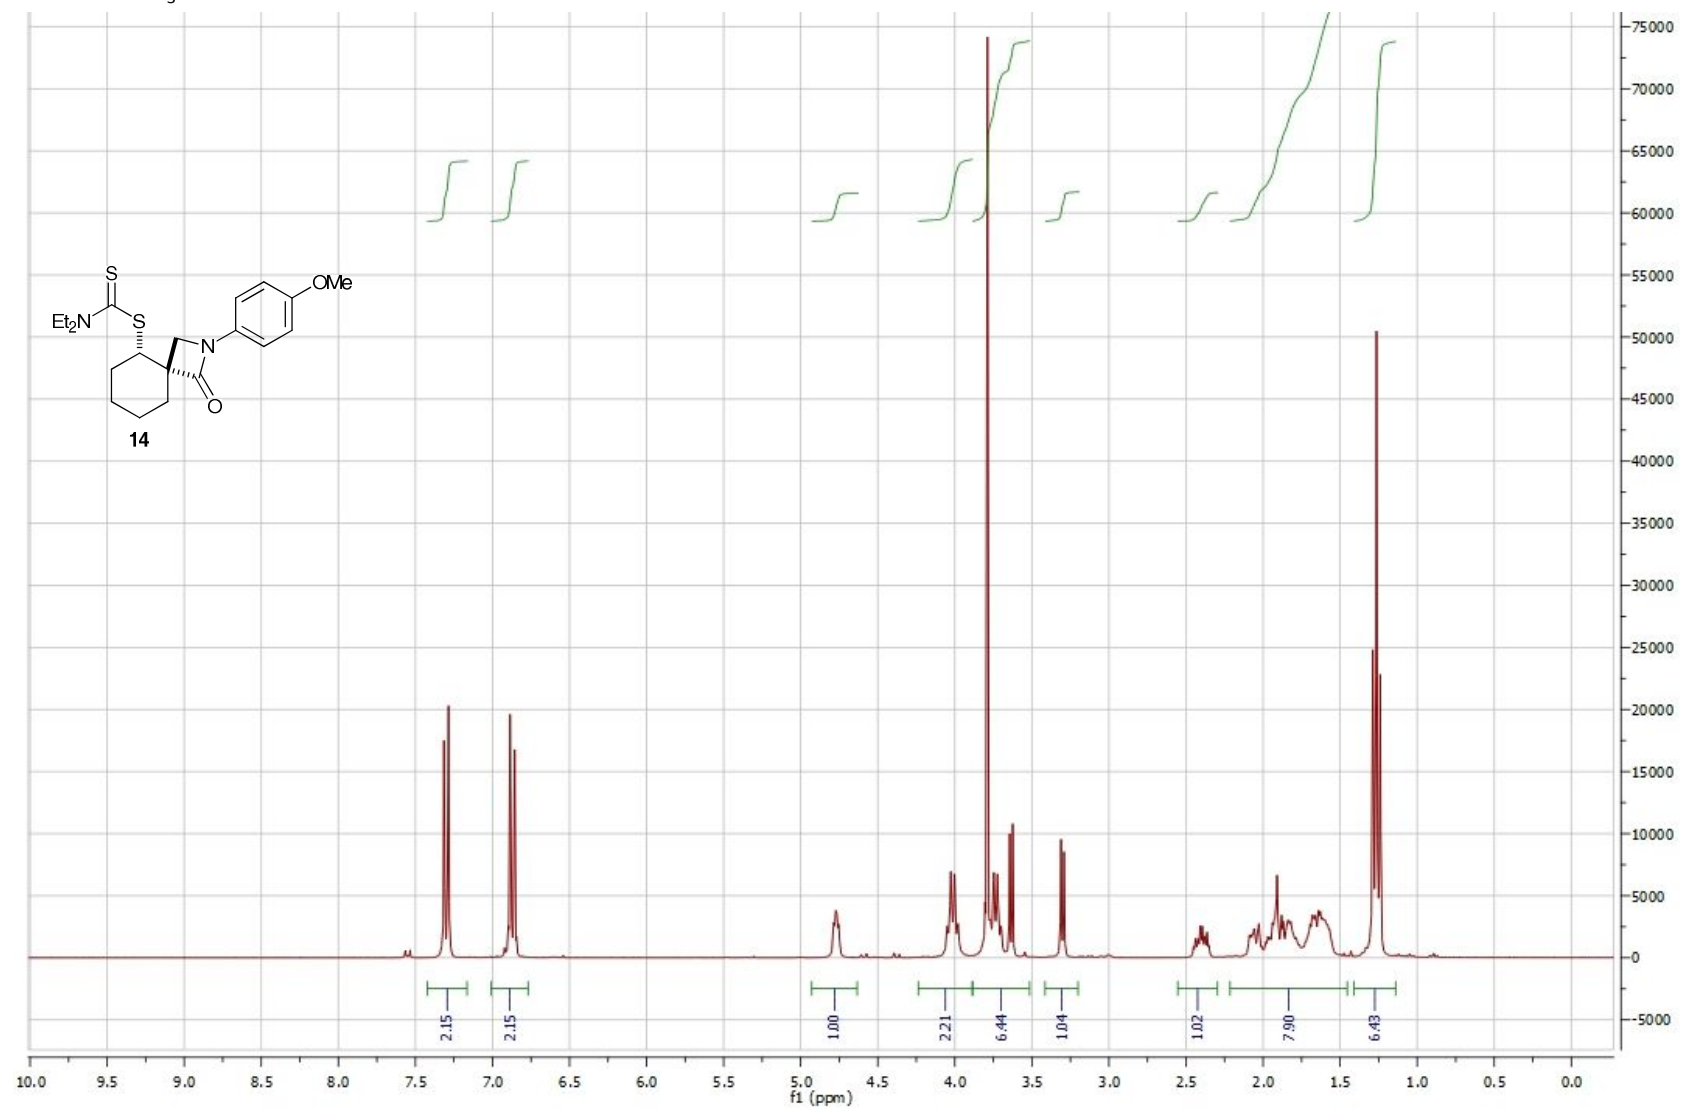

$^{13}\text{C}$  NMR  $\text{CDCl}_3$  100 MHz

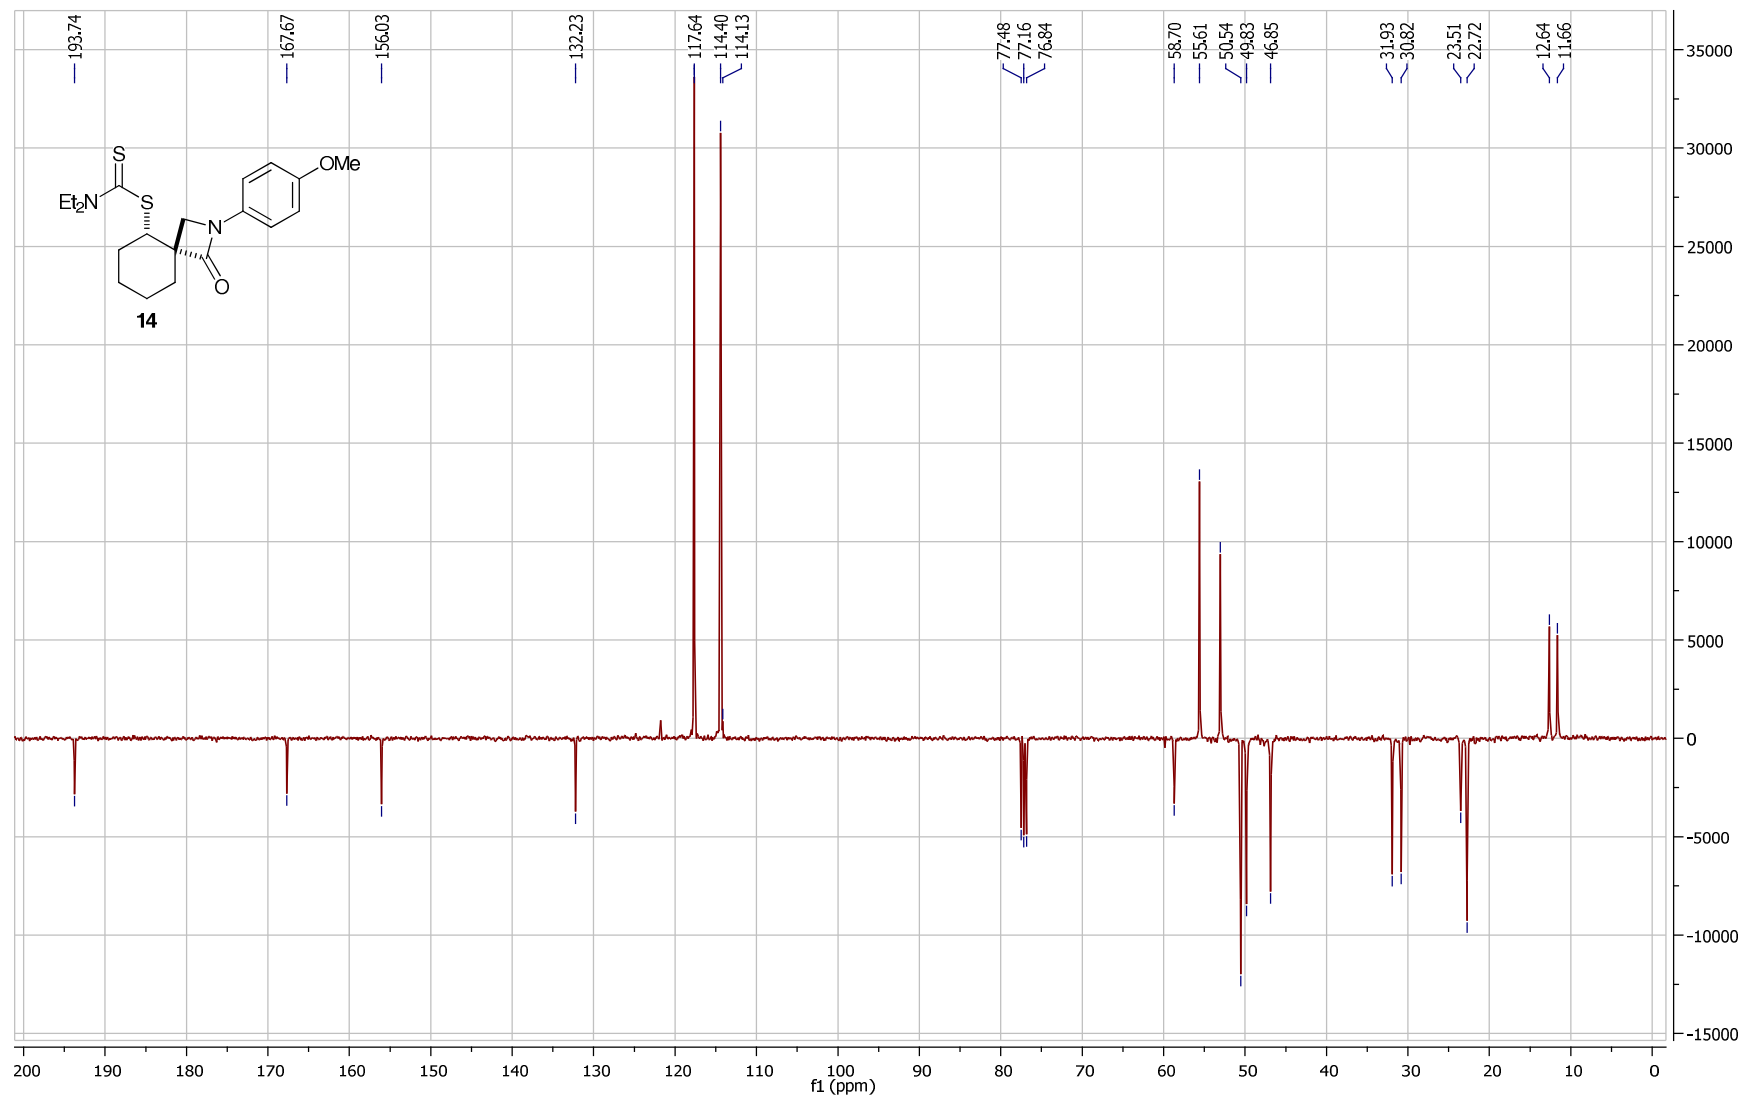

400 MHz CDCl<sub>3</sub> 1D-GOESY

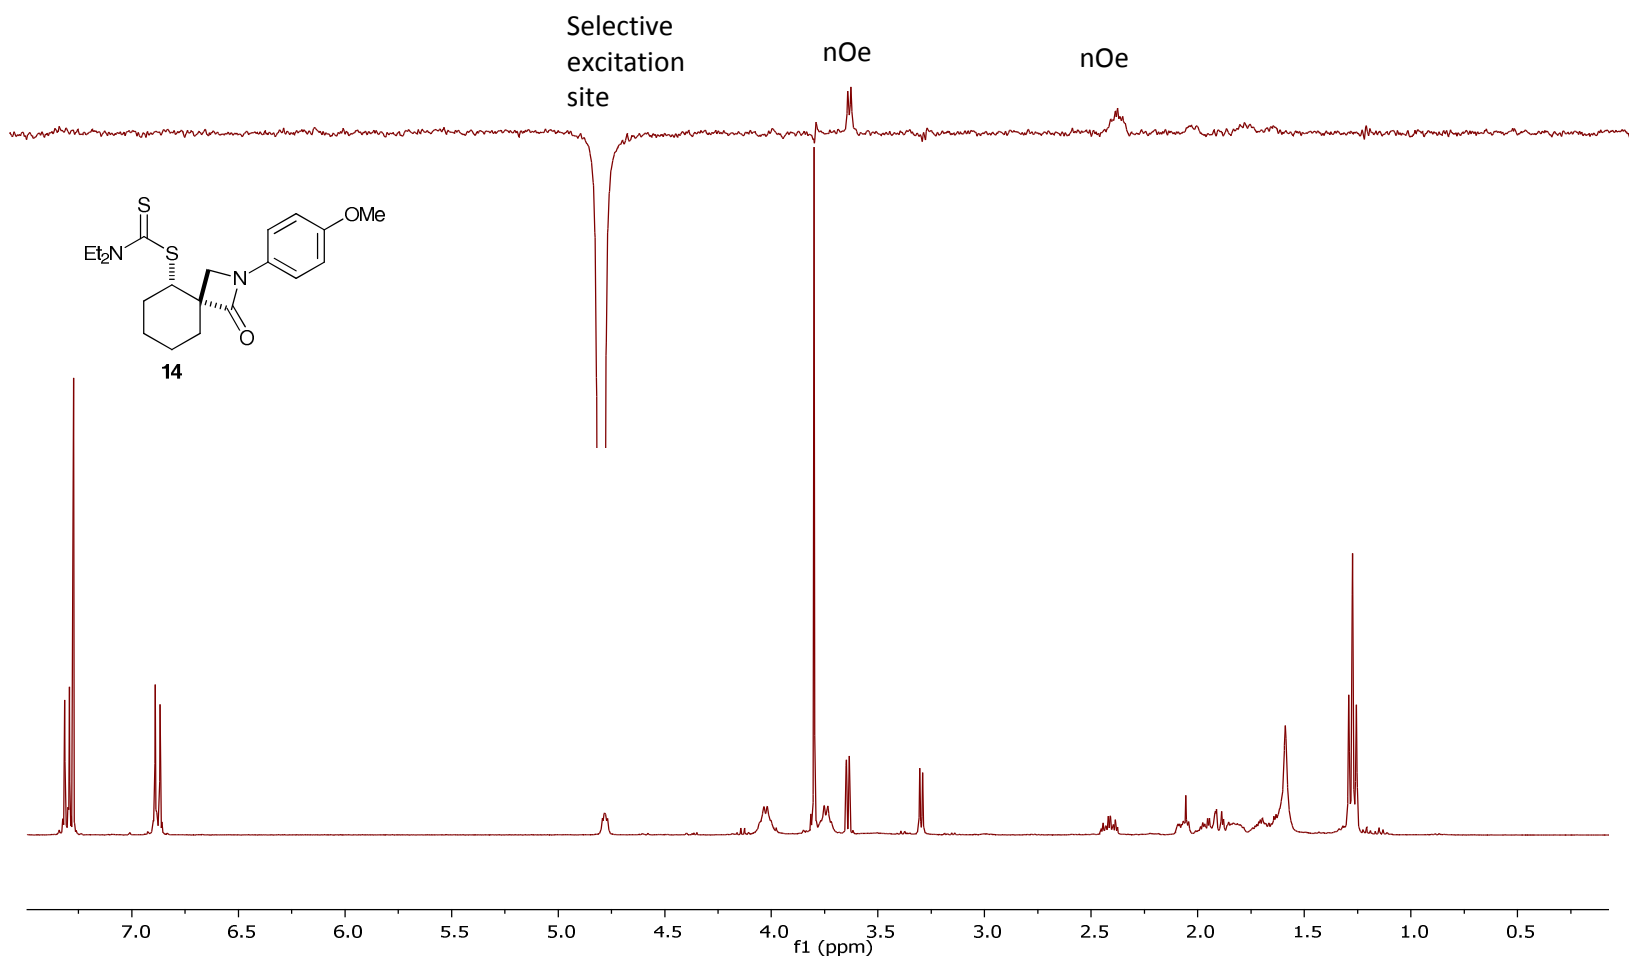

400 MHz CDCl<sub>3</sub> 1D-GOESY

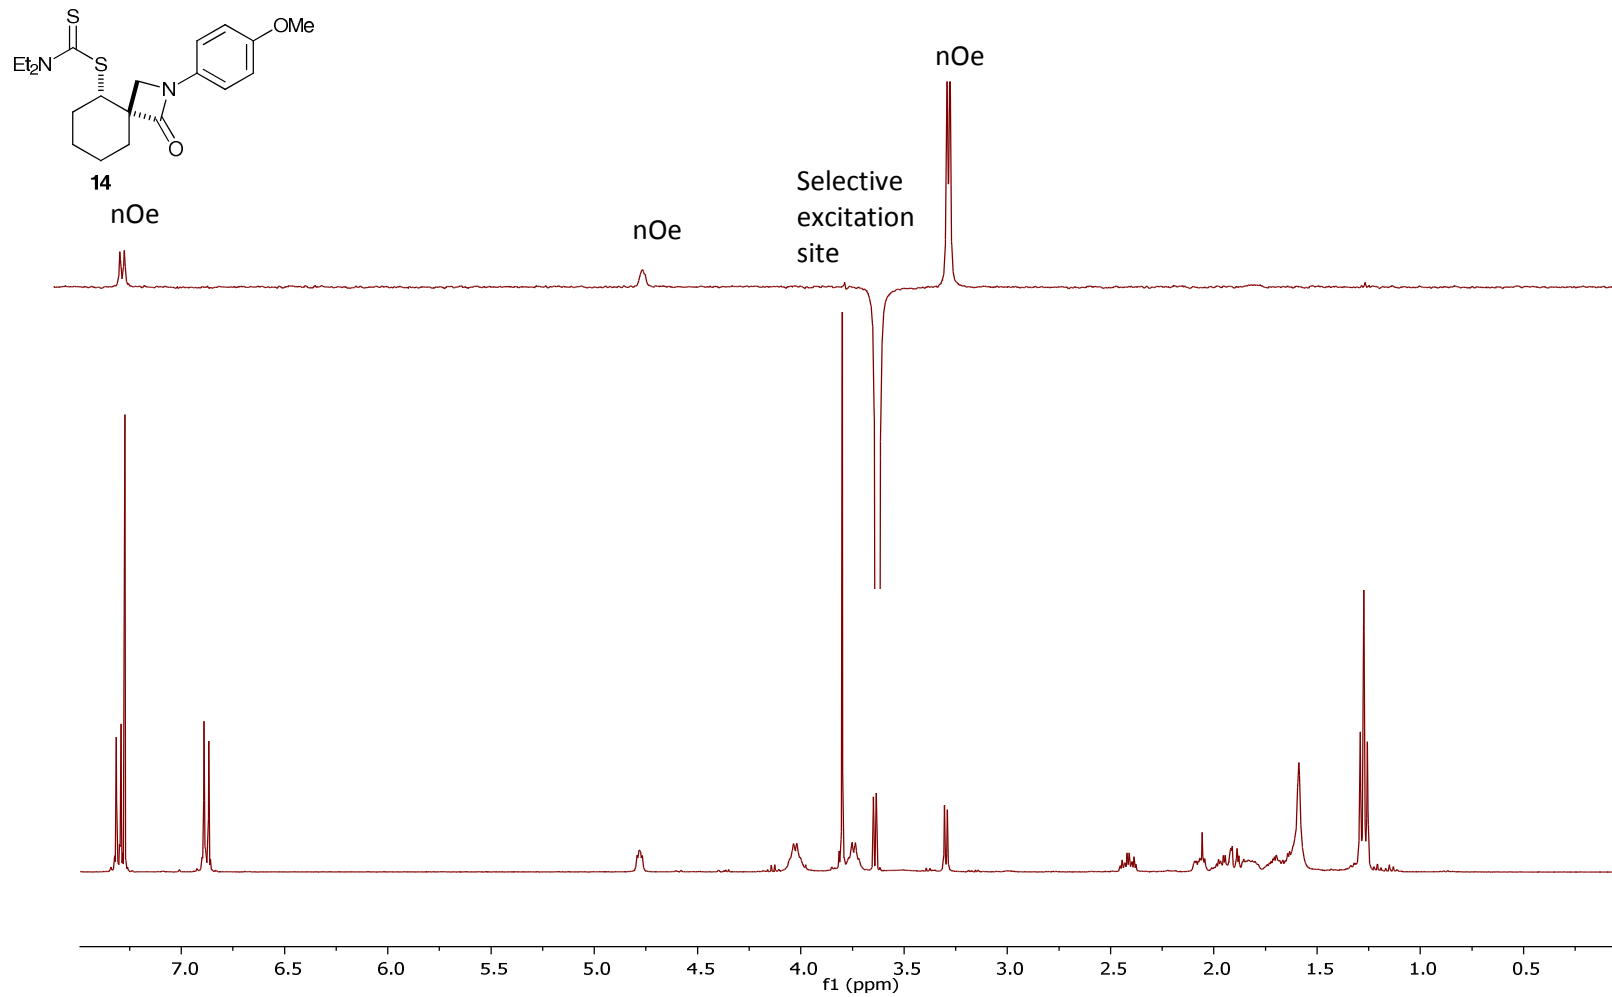



400 MHz CDCl<sub>3</sub> 1D-GOESY

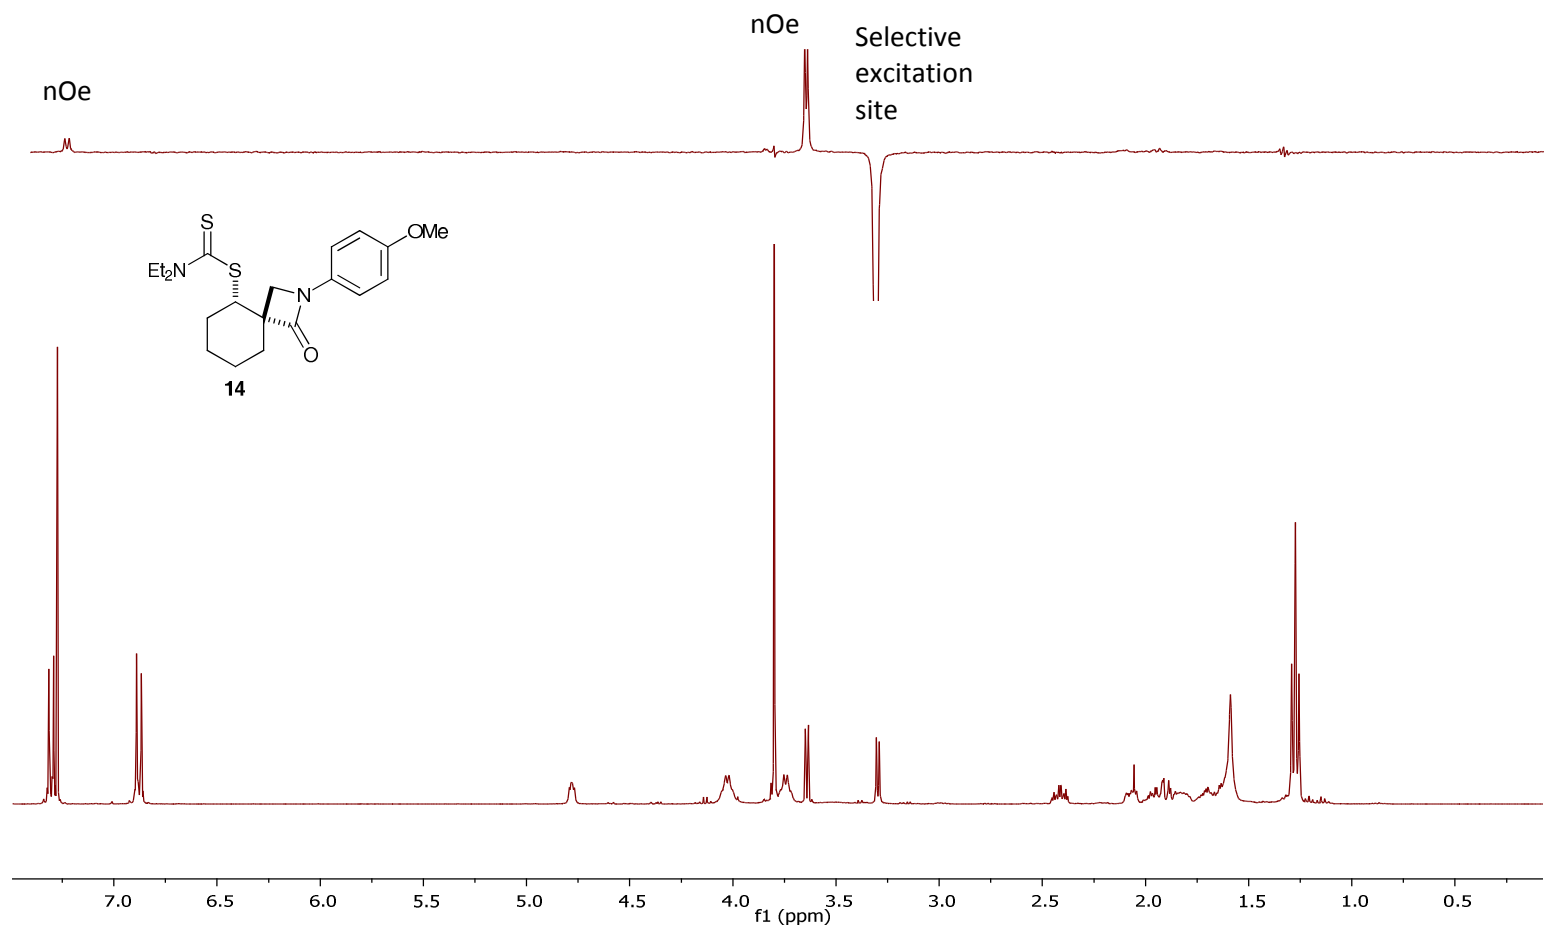

$^1\text{H}$  NMR  $\text{CDCl}_3$  300 MHz

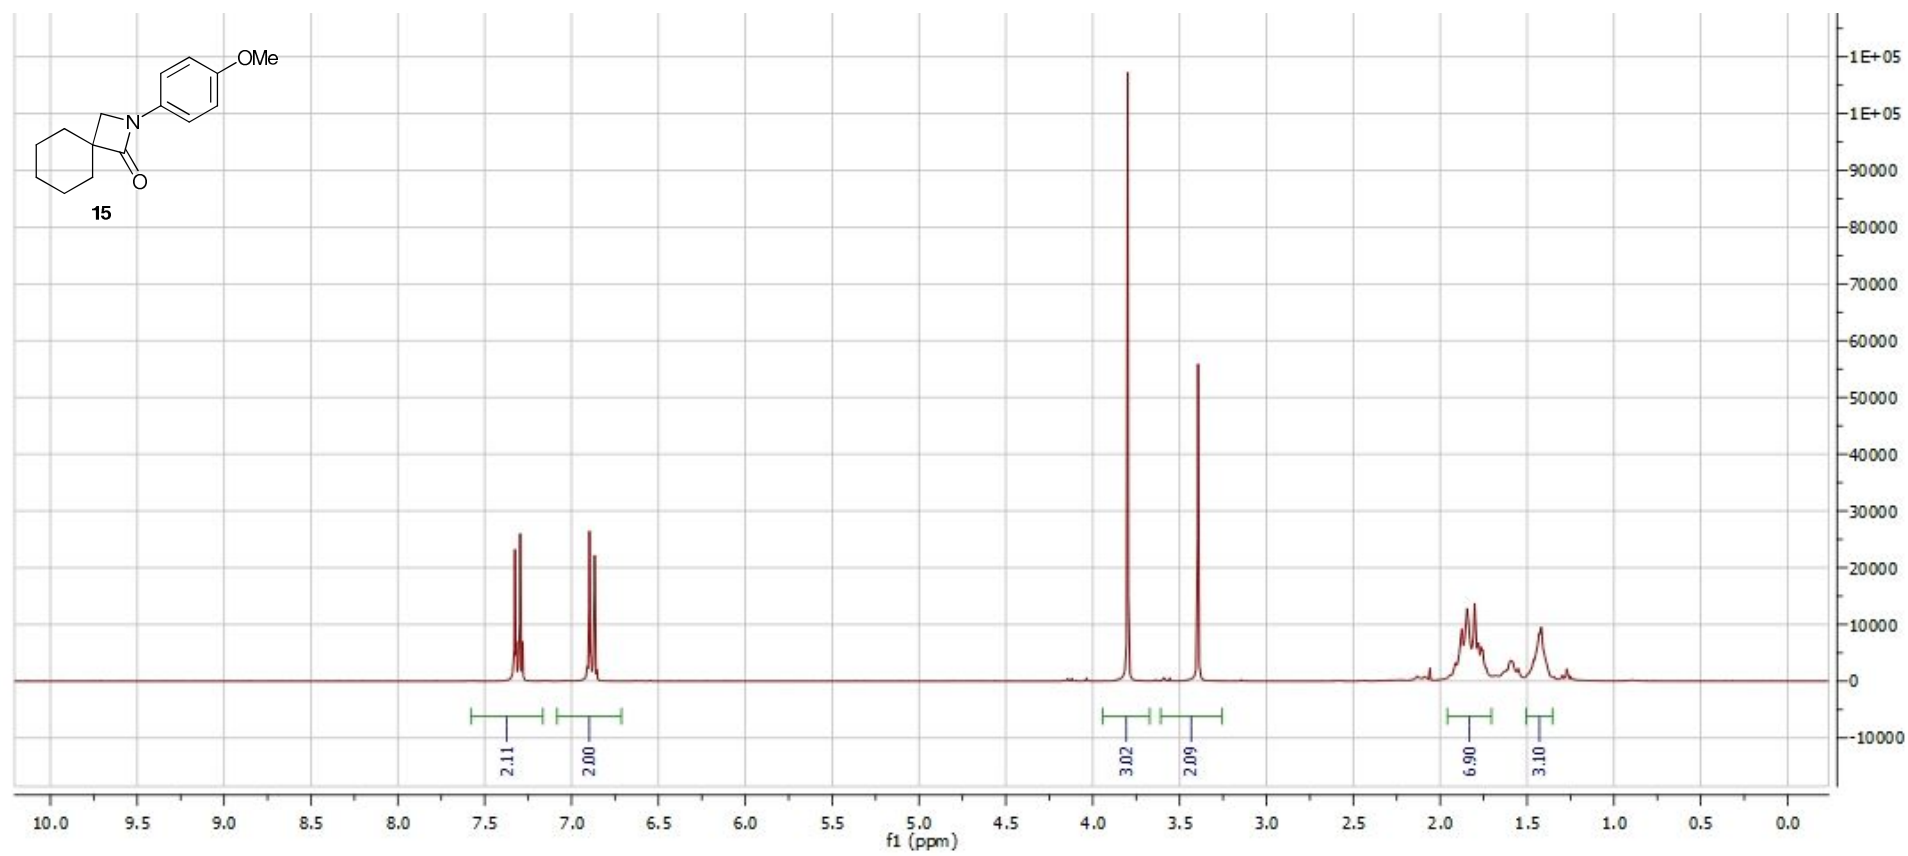

$^{13}\text{C}$  NMR  $\text{CDCl}_3$  100 MHz

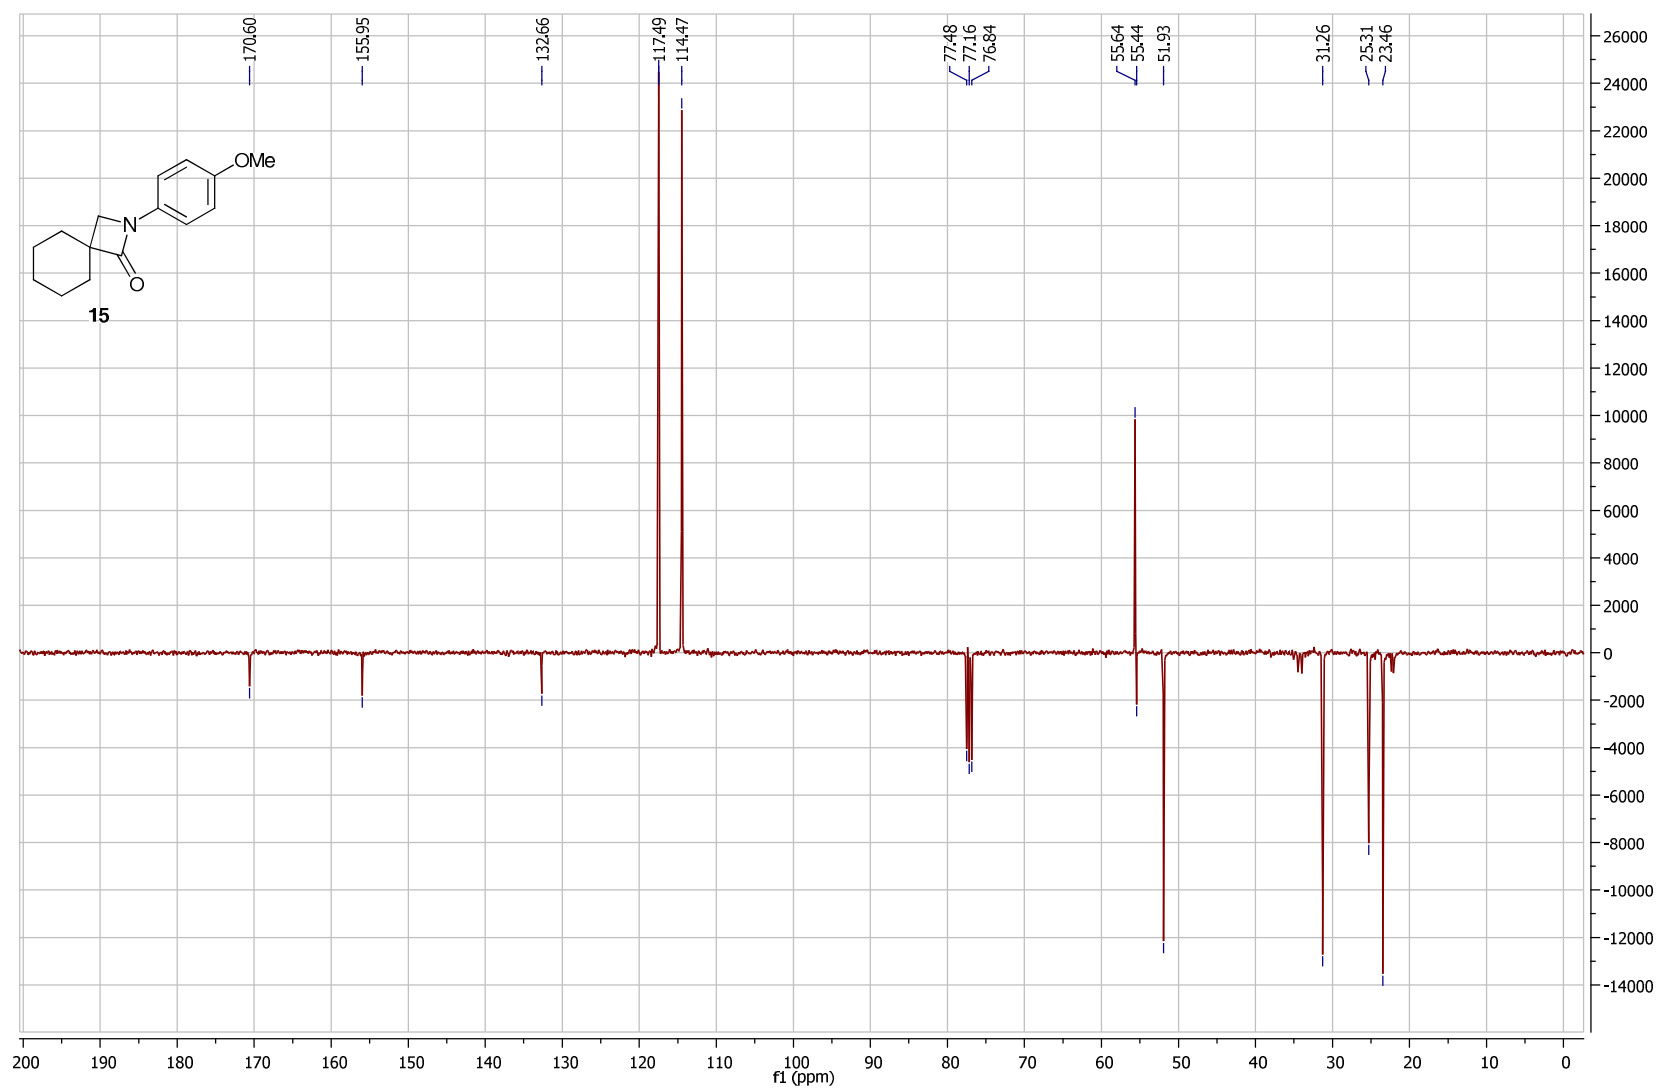

$^1\text{H}$  NMR  $\text{CDCl}_3$  300 MHz

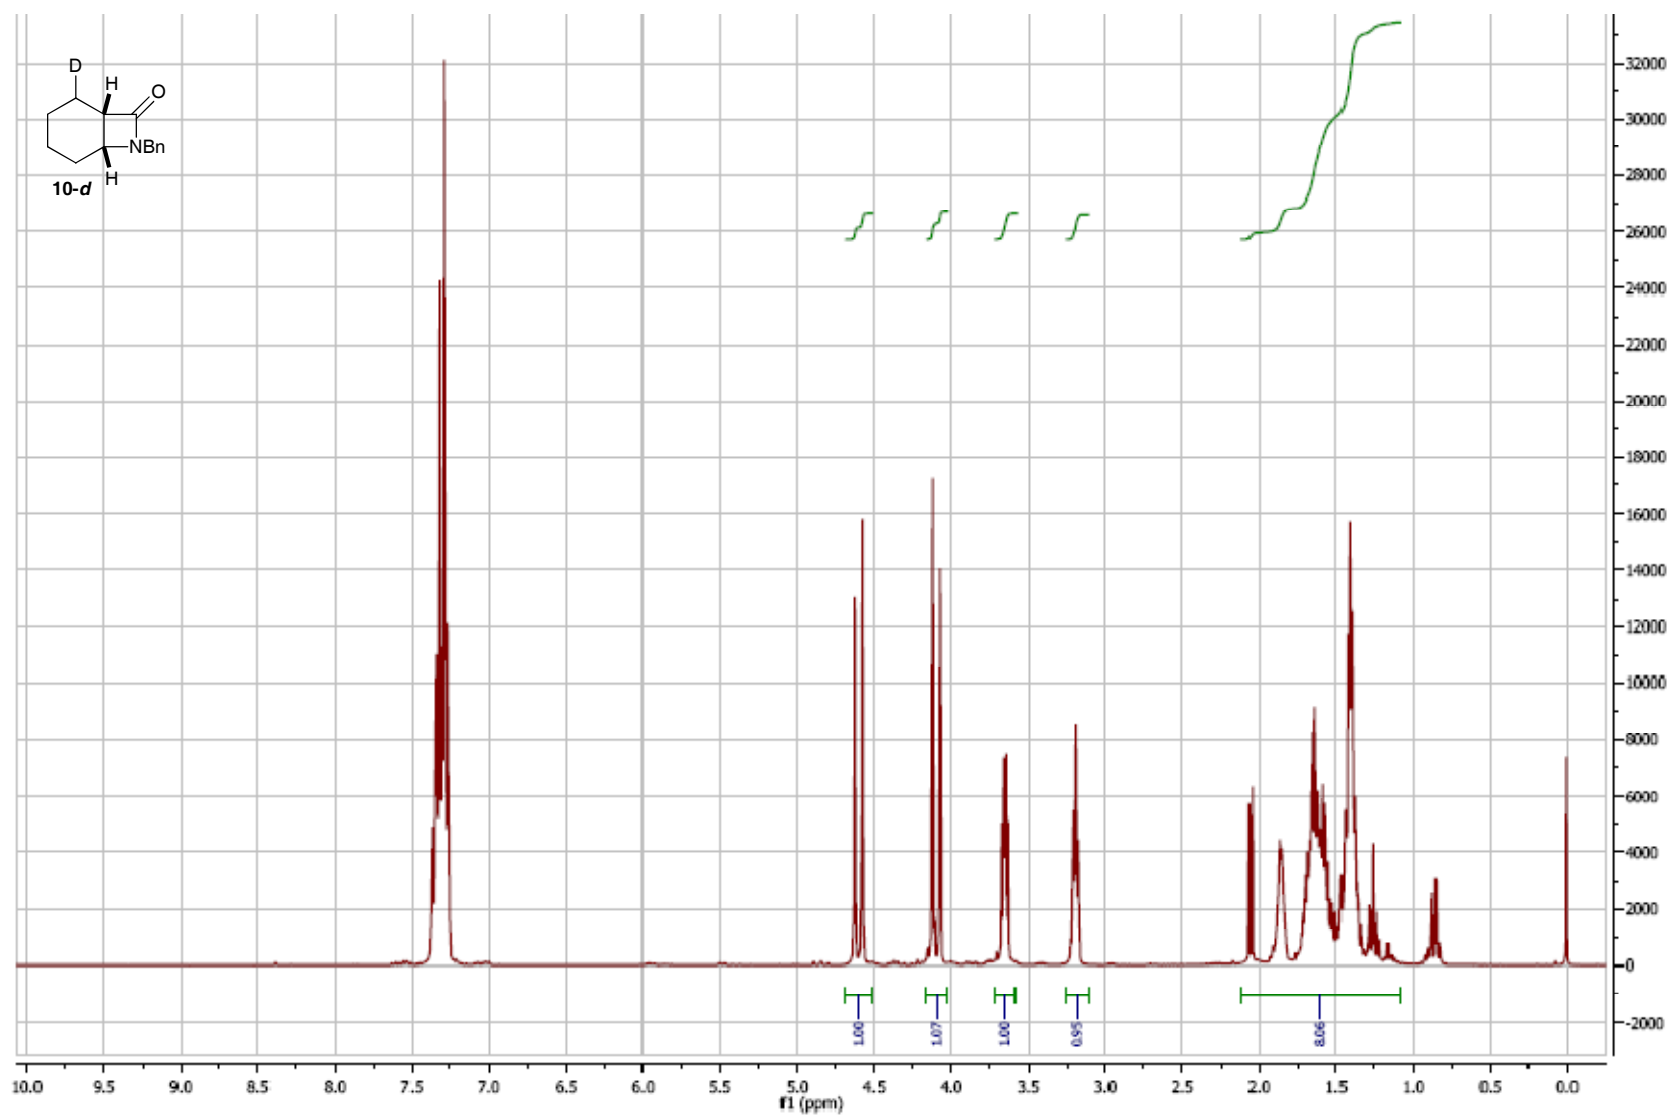

$^{13}\text{C}$  NMR  $\text{CDCl}_3$  100 MHz

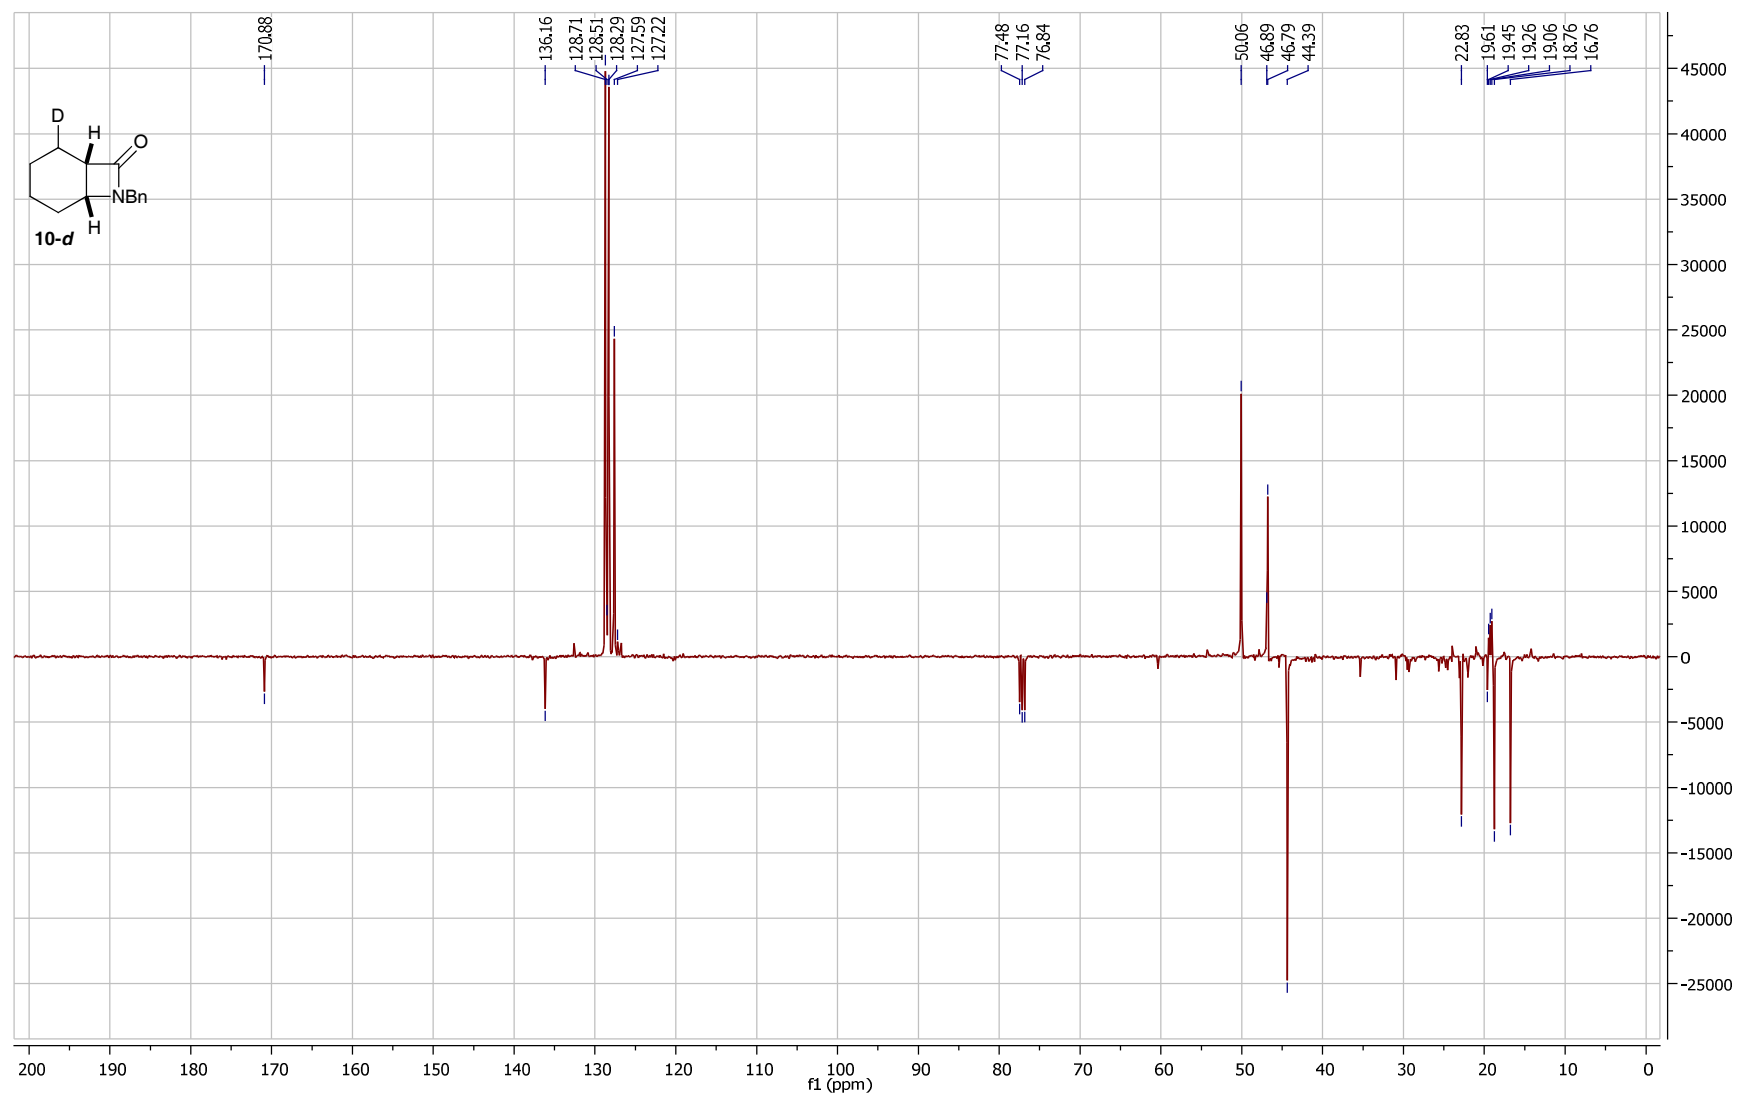

$^1\text{H}$  NMR  $\text{CDCl}_3$  300 MHz

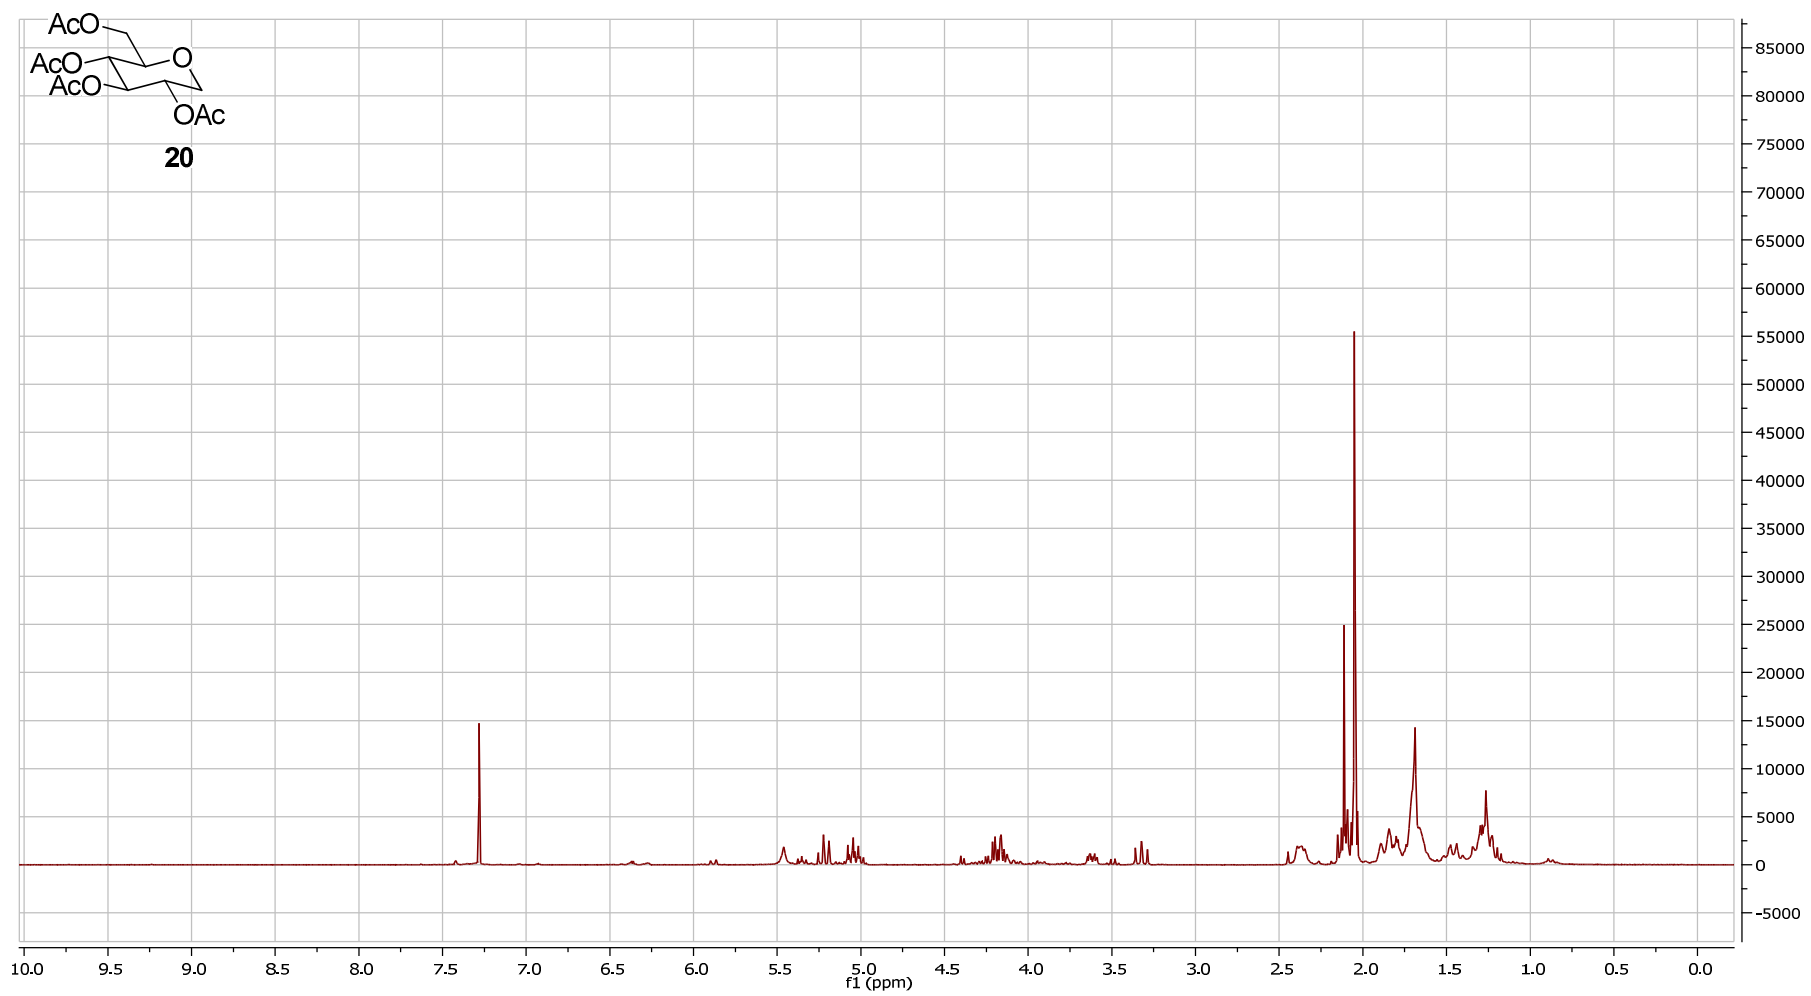

$^1\text{H}$  NMR  $\text{CDCl}_3$  300 MHz

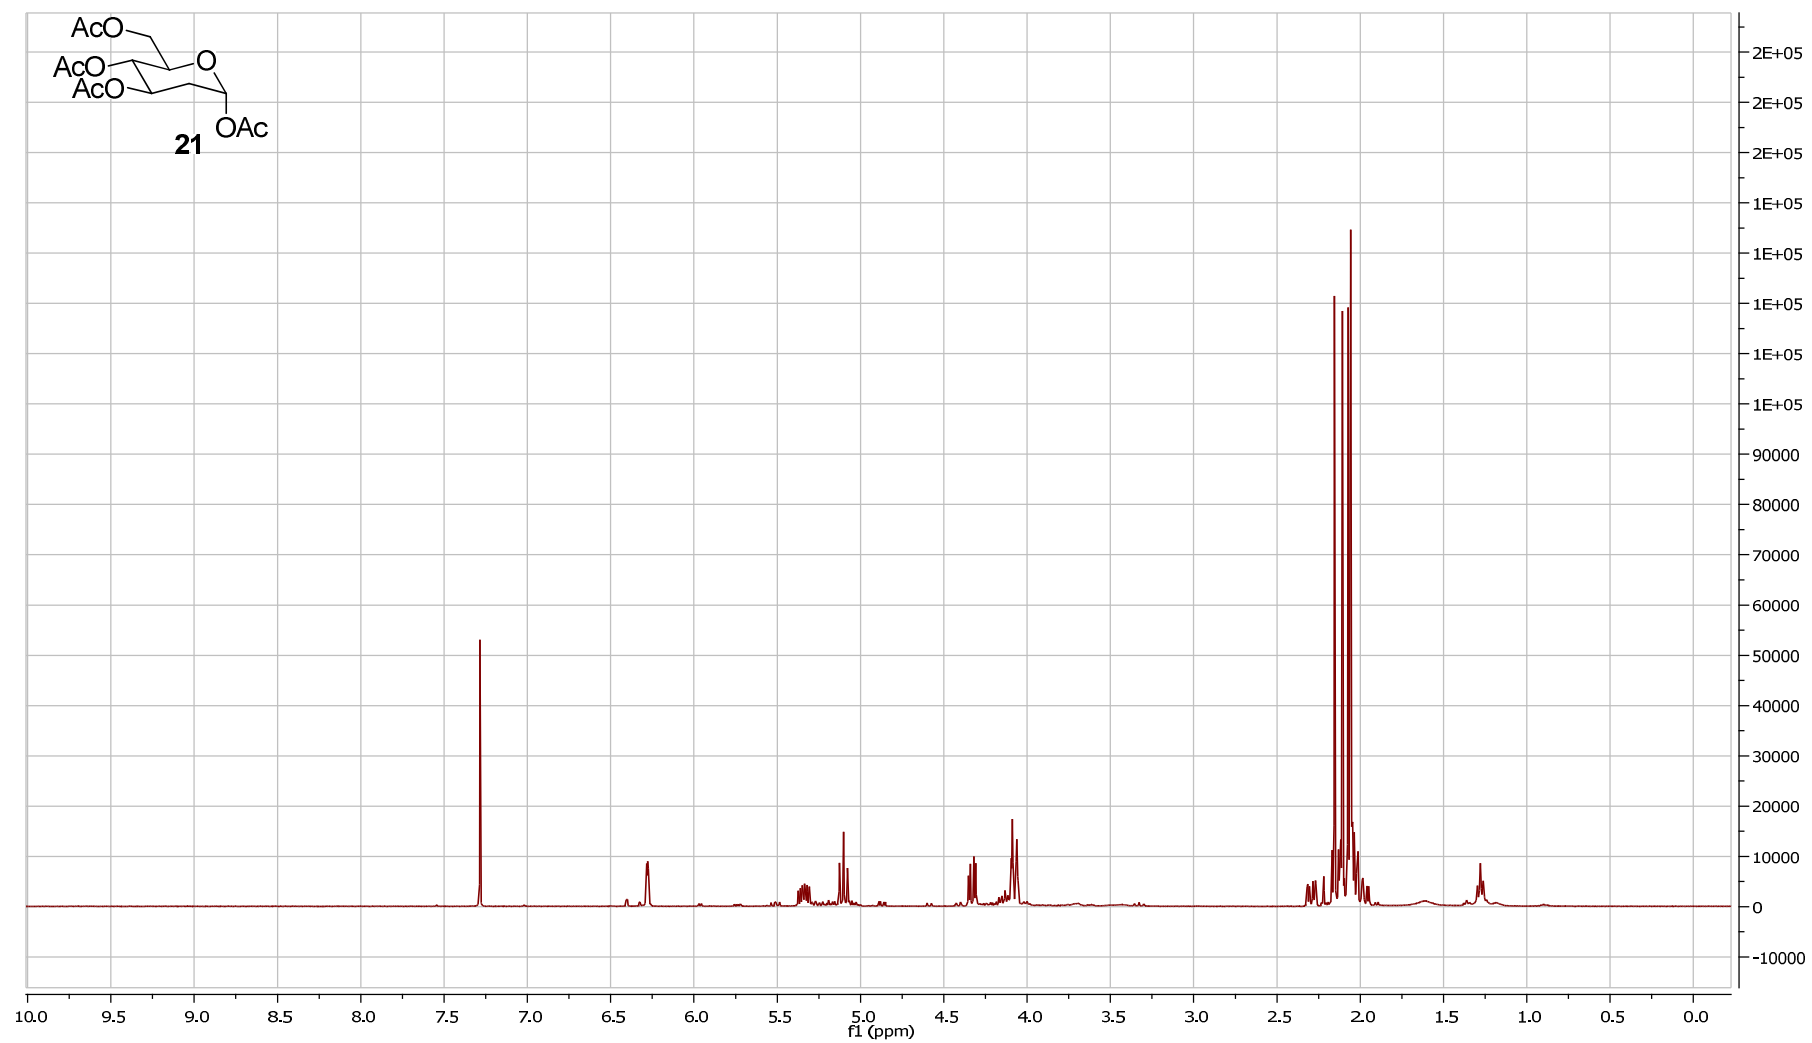

Supplement: c2ob25434d.pdf [file c2ob25434d.pdf]
